# Supplementary material for: Aerobic, Cu-catalyzed desulfitative C–C bond-forming reaction of ketene dithioacetals/vinylogous thioesters and arylboronic acids
Source: Royal Society of Chemistry journal article supplement (doi:10.1039/c1cc11382h), 2011-01-01
Supplement: c1cc11382h.pdf [file c1cc11382h.pdf]

## Supporting Information

### Aerobic, copper-catalyzed desulfitative C–C bond-forming reaction of ketene dithioacetals/vinylogous thioesters and arylboronic acids

Ying Dong, Mang Wang,\* Jun Liu, Wei Ma, and Qun Liu\*

Department of Chemistry, Northeast Normal University, Changchun 130024, China China  
State Key Laboratory of Elemento-organic Chemistry, Nankai University, Tianjin  
300071, China  
E-mail: wangm452@nenu.edu.cn

#### Table of contents

|                                                                         |    |
|-------------------------------------------------------------------------|----|
| I. General.....                                                         | 2  |
| II. Preparation of ketene dithioacetals <b>1a–k</b> .....               | 2  |
| III. Synthesis and analytical data of <b>3a–o</b> .....                 | 2  |
| IV. Synthesis and analytical data of <b>4a–e</b> .....                  | 9  |
| V. References.....                                                      | 11 |
| VI. Copies of NMR spectra for compounds <b>3a–o</b> , <b>4a–e</b> ..... | 12 |

## I. General

All reagents were purchased from commercial sources and used without treatment, unless otherwise indicated. The products were purified by column chromatography over silica gel.  $^1\text{H}$  NMR and  $^{13}\text{C}$  NMR spectra were recorded at 25°C on a Varian 500 MHz and 125 MHz or a Bruker 100 MHz, respectively, and using TMS as internal standard. IR spectra (KBr) were recorded on a Magna-560 FTIR spectrophotometer in the range of 400~4000  $\text{cm}^{-1}$ . High-resolution mass spectra (HRMS) were obtained using a Bruker microTOF II focus spectrometer (ESI). Melting points were uncorrected. The substrates, **1a–i**,<sup>1a</sup> **1j** and **1k**,<sup>1b</sup> were prepared according to the procedures in our previously reported papers.

## II. Preparation of ketene dithioacetals **1a–k**

**General procedure for the synthesis of ketene dithioacetals **1a–i**** (taking **1a** as example): To a well-stirred suspension of diethyl malonate (15.2 mL, 100 mmol),  $\text{K}_2\text{CO}_3$  (30.4 g, 220 mmol) and DMF (40 mL) at room temperature was added  $\text{CS}_2$  (6.6 mL, 110 mmol) at 0 °C. After the reaction mixture was stirred at 0 °C for 0.5 h,  $\text{PhCH}_2\text{Br}$  (26.2 mL, 220 mmol) was added dropwise within 15 min. The mixture was allowed to warm to room temperature and stirred for 8.0 h, and then poured into ice-water (200 mL) under stirring and neutralized with dilute HCl. The resulting mixture was extracted with  $\text{CH}_2\text{Cl}_2$  ( $3 \times 80$  mL). The combined organic phase was washed with water ( $5 \times 80$  mL), dried over anhydrous  $\text{MgSO}_4$ , filtered and concentrated in vacuo. The crude product was purified by flash chromatography (silica gel, petroleum ether/diethyl ether 20/1, V/V) to give diethyl 2-(bis(benzylthio)methylene)malonate **1a** (38.9 g, 93%) as a yellow crystal.

**General procedure for the synthesis of ketene dithioacetals **1j** and **1k**** (taking **1j** as an example): To a solution of 3-(bis(methylthio)methylene)pentane-2,4-dione (1.02 g, 5.0 mmol) in 50 mL of  $\text{CH}_2\text{Cl}_2$  was added concentrated  $\text{H}_2\text{SO}_4$  (1.1 mL, 20 mmol) at 0 °C. The mixture was allowed to warm to room temperature and stirred for 10 h, and then poured onto saturated NaCl ice-water (50 mL) under stirring. The mixture was neutralized with aqueous  $\text{Na}_2\text{CO}_3$ , and extracted with  $\text{CH}_2\text{Cl}_2$  ( $3 \times 20$  mL). The combined organic phase was washed with water ( $3 \times 15$  mL), dried over  $\text{MgSO}_4$  and concentrated in vacuo. The crude product was purified by flash chromatography (silica gel, petroleum ether/diethyl ether 30/1, V/V) to give 4,4-bis(methylthio)but-3-en-2-one **1j** (770 mg, 95%) as a white solid.

## III. Synthesis and analytical data of **3a–o**

**General Procedure for the reaction of ketene dithioacetals **1a–e** and boronic acids **2** leading to**

**3a–l** (taking the reaction of **1a** and **2a** as an example): To a solution of **1a** (208 mg, 0.5 mmol) and 4-chlorophenylboronic acid **2a** (234 mg, 1.5 mmol) in DMF (4.0 mL) was added Cu(OAc)<sub>2</sub> (27 mg, 0.15 mmol). The reaction mixture was allowed to stir at 130°C for 60 h and monitored by TLC. Then the mixture was cooled to room temperature and poured into the saturated aqueous NaCl solution (50 mL). The resulting mixture was extracted with dichloromethane (3 × 20 mL). The combined organic phase was dried over anhydrous MgSO<sub>4</sub>, filtered, and concentrated in vacuo. Purification was carried out by flash silica gel chromatography using petroleum ether/diethyl ether (100:1, V/V) as eluent to give diethyl 2-(benzylthio(4-chlorophenyl)methylene)malonate **3a** (142 mg, 70%), benzyl(4-chlorophenyl)sulfane (83 mg, 71%) and 4,4'-dichlorobiphenyl (42 mg).

**General Procedure for the reaction of ketene dithioacetals 1f–h with boronic acid 2a leading to 3m–o** (taking the reaction of **1f** and **2a** as an example): To a solution of **1f** (117 mg, 0.5 mmol) and PhB(OH)<sub>2</sub> **2b** (183 mg, 1.5 mmol) in DMF (4.0 mL) was added Cu(OAc)<sub>2</sub> (27 mg, 0.15 mmol). The reaction mixture was allowed to stir at 110°C for 50 h and monitored by TLC. Then the mixture was cooled to room temperature and poured into the saturated aqueous NaCl solutions (50 mL). The resulting mixture was extracted with dichloromethane (3 × 20 mL). The combined organic phase was dried over anhydrous MgSO<sub>4</sub>, filtered, and concentrated in vacuo. Purification was carried out by flash silica gel chromatography using petroleum ether/diethyl ether (50:1, V/V) as eluent to give **3m** as a mixture of two isomers (79 mg, 60% yield, The molar ratio of two isomers were 3.5 to 1 based on <sup>1</sup>H NMR).

#### Diethyl 2-(benzylthio(4-chlorophenyl)methylene)malonate (**3a**)

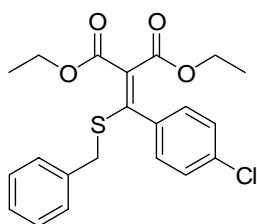

Yellowish viscous liquid; <sup>1</sup>H NMR (500 Hz, CDCl<sub>3</sub>) δ 0.96 (t, *J* = 7.0 Hz, 3H), 1.30 (t, *J* = 7.0 Hz, 3H), 3.49 (s, 2H), 3.91 (q, *J* = 7.0 Hz, 2H), 4.28 (q, *J* = 7.0 Hz, 2H), 7.02–7.04 (m, 2H), 7.11–7.12 (m, 2H), 7.21 (d, *J* = 6.5 Hz, 3H), 7.32–7.33 (m, 2H); <sup>13</sup>C NMR (125 Hz, CDCl<sub>3</sub>) δ 13.8, 14.3, 37.6, 61.4, 61.5, 122.7, 127.6, 128.6 (2C), 128.7 (2C), 129.0 (2C), 129.8 (2C), 134.1, 135.2, 135.9, 159.5, 164.0, 164.8; IR (KBr): 3061, 2924, 2854, 1728, 1245 cm<sup>-1</sup>; HRMS (ESI-TOF) calcd for C<sub>21</sub>H<sub>21</sub>ClO<sub>4</sub>SN<sup>+</sup> ([M+Na]<sup>+</sup>) 427.0741, found 427.0730; Anal. calcd for C<sub>21</sub>H<sub>21</sub>ClO<sub>4</sub>S: C, 62.29; H, 5.23. Found: C, 62.18; H, 5.29.

### Diethyl 2-(benzylthio(phenyl)methylene)malonate (3b)

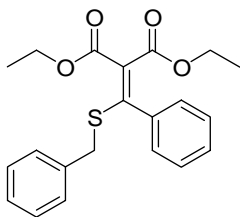

Yellow viscous liquid;  $^1\text{H}$  NMR (500 Hz,  $\text{CDCl}_3$ )  $\delta$  0.89 (t,  $J = 7.0$  Hz, 3H), 1.30 (t,  $J = 7.0$  Hz, 3H), 3.47 (s, 2H), 3.86 (q,  $J = 7.0$  Hz, 2H), 4.28 (q,  $J = 7.0$  Hz, 2H), 7.01-7.03 (m, 2H), 7.18-7.21 (m, 5H), 7.34-7.37 (m, 3H);  $^{13}\text{C}$  NMR (125 Hz,  $\text{CDCl}_3$ )  $\delta$  13.5, 14.1, 37.4, 61.0, 61.1, 121.8, 127.2, 128.1 (2C), 128.2 (2C), 128.3 (2C), 128.8 (2C), 128.9, 135.5, 135.9, 161.1, 163.9, 165.0; IR (KBr): 3084, 3028, 2989, 1720, 1285  $\text{cm}^{-1}$ ; HRMS (ESI-TOF) calcd for  $\text{C}_{21}\text{H}_{22}\text{O}_4\text{SNa}^+$  ( $[\text{M}+\text{Na}]^+$ ) 393.1131, found 393.1125.

### Diethyl 2-(benzylthio(3-nitrophenyl)methylene)malonate (3c)

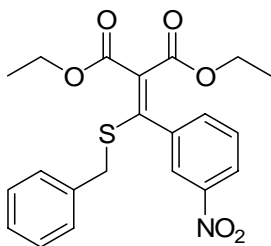

Yellow viscous liquid;  $^1\text{H}$  NMR (500 Hz,  $\text{CDCl}_3$ )  $\delta$  0.96 (t,  $J = 7.0$  Hz, 3H), 1.34 (t,  $J = 7.0$  Hz, 3H), 3.52 (s, 2H), 3.90 (q,  $J = 7.0$  Hz, 2H), 4.33 (q,  $J = 7.0$  Hz, 2H), 6.97 (t,  $J = 4.0$  Hz, 2H), 7.18-7.19 (m, 3H), 7.48-7.55 (m, 2H), 7.94 (s, 1H), 8.20 (d,  $J = 8.0$  Hz, 1H);  $^{13}\text{C}$  NMR (125 Hz,  $\text{CDCl}_3$ )  $\delta$  13.7, 14.1, 37.3, 61.3, 61.6, 123.5, 123.6, 123.8, 127.6, 128.5 (2C), 128.6 (2C), 129.2, 134.2, 135.4, 136.9, 147.7, 156.9, 163.7, 163.8; IR (KBr): 3055, 2980, 1726, 1245  $\text{cm}^{-1}$ ; HRMS (ESI-TOF) calcd for  $\text{C}_{21}\text{H}_{21}\text{NO}_6\text{SNa}^+$  ( $[\text{M}+\text{Na}]^+$ ) 438.0982, found 438.0973; Anal. calcd for  $\text{C}_{21}\text{H}_{21}\text{NO}_6\text{S}$ : C, 60.71; H, 5.09; N, 3.37. Found: C, 60.80; H, 5.01; N, 3.39.

### Diethyl 2-(benzylthio(p-tolyl)methylene)malonate (3d)

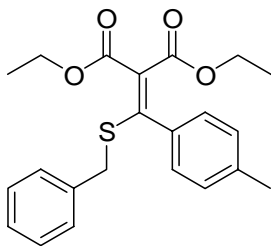

White semi-solid;  $^1\text{H}$  NMR (500 Hz,  $\text{CDCl}_3$ )  $\delta$  0.93 (t,  $J = 7.0$  Hz, 3H), 1.29 (t,  $J = 7.0$  Hz, 3H), 2.37 (s, 3H), 3.48 (s, 2H), 3.89 (q,  $J = 7.0$  Hz, 2H), 4.27 (q,  $J = 7.0$  Hz, 2H), 7.04-7.05 (m, 2H),

7.09 (d,  $J = 8.5$  Hz, 2H), 7.16-7.20 (m, 5H);  $^{13}\text{C}$  NMR (125 Hz,  $\text{CDCl}_3$ )  $\delta$  13.6, 14.2, 21.3, 37.5, 61.0, 61.1, 121.7, 127.3, 128.1 (2C), 128.4 (2C), 128.9 (2C), 129.0 (2C), 132.7, 136.0, 138.9, 161.5, 164.0, 165.1; IR (KBr): 3064, 2923, 2854, 1728, 1244, 1079  $\text{cm}^{-1}$ ; HRMS (ESI-TOF) calcd for  $\text{C}_{22}\text{H}_{24}\text{O}_4\text{SNa}^+$  ( $[\text{M}+\text{Na}]^+$ ) 407.1288, found 407.1302.

### Diethyl 2-(benzylthio(m-tolyl)methylene)malonate (3e)

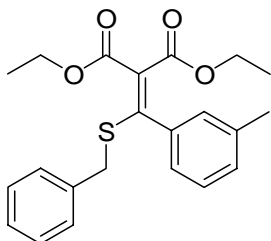

Yellow viscous liquid;  $^1\text{H}$  NMR (500 Hz,  $\text{CDCl}_3$ )  $\delta$  0.89 (t,  $J = 7.0$  Hz, 3H), 1.30 (t,  $J = 7.0$  Hz, 3H), 2.31 (s, 3H), 3.48 (s, 2H), 3.87 (q,  $J = 7.0$  Hz, 2H), 4.27 (q,  $J = 7.0$  Hz, 2H), 6.93 (s, 1H), 6.99-7.02 (m, 3H), 7.14-7.20 (m, 4H), 7.24-7.26 (m, 1H);  $^{13}\text{C}$  NMR (125 Hz,  $\text{CDCl}_3$ )  $\delta$  13.5, 14.1, 21.2, 37.4, 60.8, 61.0, 121.8, 125.3, 127.2, 128.1, 128.3 (2C), 128.9 (3C), 129.5, 135.5, 136.2, 137.9, 161.2, 163.9, 164.9; IR (KBr): 3032, 2926, 2856, 1728, 1245  $\text{cm}^{-1}$ ; HRMS (ESI-TOF) calcd for  $\text{C}_{22}\text{H}_{24}\text{O}_4\text{SNa}^+$  ( $[\text{M}+\text{Na}]^+$ ) 407.1288, found 407.1293.

### Diethyl 2-(benzylthio(o-tolyl)methylene)malonate (3f)

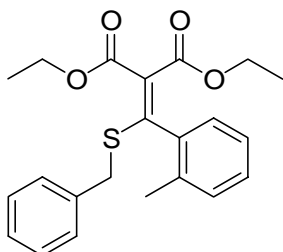

Yellow semi-solid;  $^1\text{H}$  NMR (500 Hz,  $\text{CDCl}_3$ )  $\delta$  0.93 (t,  $J = 7.0$  Hz, 3H), 1.29 (t,  $J = 7.0$  Hz, 3H), 2.37 (s, 3H), 3.48 (s, 2H), 3.89 (q,  $J = 7.0$  Hz, 2H), 4.27 (q,  $J = 7.0$  Hz, 2H), 7.04-7.05 (m, 2H), 7.09 (d,  $J = 8.5$  Hz, 2H), 7.16-7.20 (m, 5H);  $^{13}\text{C}$  NMR (125 Hz,  $\text{CDCl}_3$ )  $\delta$  13.6, 14.1, 21.3, 37.5, 60.9, 61.0, 127.2, 127.7, 128.2 (2C), 128.4 (2C), 129.0 (4C), 132.8, 136.2, 138.9, 161.2, 164.0, 165.0; IR (KBr): 3028, 2925, 1727, 1690, 1243,  $\text{cm}^{-1}$ ; HRMS (ESI-TOF) calcd for  $\text{C}_{22}\text{H}_{24}\text{O}_4\text{SNa}^+$  ( $[\text{M}+\text{Na}]^+$ ) 407.1288, found 407.1296.

### Diethyl 2-(benzylthio(biphenyl-4-yl)methylene)malonate (3g)

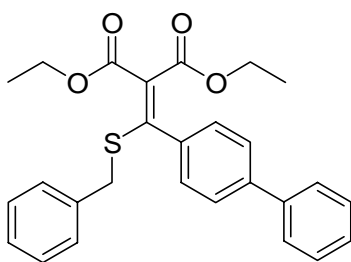

Yellowish viscous liquid;  $^1\text{H}$  NMR (500 Hz,  $\text{CDCl}_3$ )  $\delta$  0.90 (t,  $J = 7.0$  Hz, 3H), 1.31 (t,  $J = 7.0$  Hz, 3H), 3.55 (s, 2H), 3.90 (q,  $J = 7.0$  Hz, 2H), 4.29 (q,  $J = 7.0$  Hz, 2H), 7.03-7.05 (m, 2H), 7.18-7.20 (m, 3H), 7.25-7.26 (m, 2H), 7.38 (t,  $J = 7.0$  Hz, 1H), 7.45-7.48 (m, 2H), 7.59 (t,  $J = 9.0$  Hz, 4H);  $^{13}\text{C}$  NMR (125 Hz,  $\text{CDCl}_3$ )  $\delta$  13.6, 14.2, 37.5, 61.1, 61.2, 122.0, 126.8 (2C), 127.0 (2C), 127.3, 127.8, 128.4 (2C), 128.7 (2C), 128.8 (2C), 128.9 (2C), 134.4, 136.0, 140.1, 141.7, 160.9, 163.9, 165.0; IR (KBr): 3029, 2926, 2855, 1725, 1245, 1083  $\text{cm}^{-1}$ ; HRMS (ESI-TOF) calcd for  $\text{C}_{27}\text{H}_{27}\text{O}_4\text{S}^+$  ( $[\text{M}+\text{H}]^+$ ) 447.1625, found 447.1630; Anal. Calcd for  $\text{C}_{27}\text{H}_{26}\text{O}_4\text{S}$ : C, 72.62; H, 5.87. Found: C, 72.73; H, 5.84.

#### Diethyl 2-(benzylthio(naphthalen-2-yl)methylene)malonate (3h)

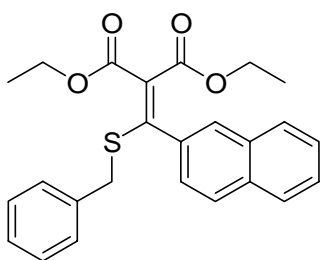

Yellow viscous liquid;  $^1\text{H}$  NMR (500 Hz,  $\text{CDCl}_3$ )  $\delta$  0.75 (t,  $J = 7.0$  Hz, 3H), 1.32 (t,  $J = 7.0$  Hz, 3H), 3.47 (s, 2H), 3.79 (q,  $J = 7.0$  Hz, 2H), 4.30 (q,  $J = 7.0$  Hz, 2H), 6.94-6.96 (m, 2H), 7.13-7.14 (m, 3H), 7.36 (d,  $J = 8.5$  Hz, 1H), 7.51-7.54 (m, 2H), 7.60 (s, 1H), 7.78 (d,  $J = 8.0$  Hz, 1H), 7.86 (d,  $J = 8.5$  Hz, 2H);  $^{13}\text{C}$  NMR (125 Hz,  $\text{CDCl}_3$ )  $\delta$  13.5, 14.2, 37.5, 61.0, 61.2, 122.2, 125.8, 126.7, 127.0, 127.3, 127.5, 127.7, 128.1, 128.3 (2C), 128.8, 128.9 (2C), 130.9, 132.6, 133.0, 135.9, 161.1, 163.9, 165.0; IR (KBr): 3058, 2928, 1725, 1232  $\text{cm}^{-1}$ ; HRMS (ESI-TOF) calcd for  $\text{C}_{25}\text{H}_{24}\text{O}_4\text{SNa}^+$  ( $[\text{M}+\text{Na}]^+$ ) 443.1288, found 443.1297.

#### Diethyl 2-(methylthio(phenyl)methylene)malonate (3i)

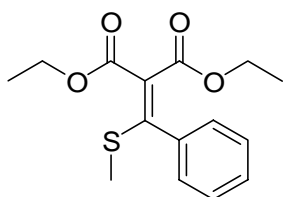

Yellow viscous liquid;  $^1\text{H}$  NMR (500 Hz,  $\text{CDCl}_3$ )  $\delta$  0.89 (t,  $J = 7.0$  Hz, 3H), 1.32 (t,  $J = 7.0$  Hz, 3H),

1.80 (s, 3H), 3.87 (q,  $J = 7.0$  Hz, 2H), 4.30 (q,  $J = 7.0$  Hz, 2H), 7.19 (d,  $J = 7.0$  Hz, 2H), 7.35-7.30 (m, 3H);  $^{13}\text{C}$  NMR (125 Hz,  $\text{CDCl}_3$ )  $\delta$  13.5, 14.2, 16.1, 61.0, 61.1, 121.4, 127.9 (2C), 128.3 (2C), 128.7, 135.4, 162.7, 163.9, 165.2; IR (KBr): 3056, 2927, 1727, 1242  $\text{cm}^{-1}$ ; HRMS (ESI-TOF) calcd for  $\text{C}_{15}\text{H}_{18}\text{O}_4\text{SNa}^+$  ( $[\text{M}+\text{Na}]^+$ ) 317.0818, found 317.0830.

### Diethyl 2-(ethylthio(phenyl)methylene)malonate (3j)

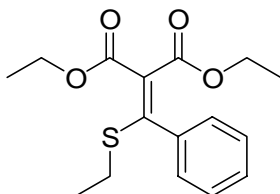

Yellow viscous liquid;  $^1\text{H}$  NMR (500 Hz,  $\text{CDCl}_3$ )  $\delta$  0.90 (t,  $J = 7.0$  Hz, 3H), 1.07 (t,  $J = 7.5$  Hz, 3H), 1.32 (t,  $J = 7.0$  Hz, 3H), 2.24 (q,  $J = 7.5$  Hz, 2H), 3.87 (q,  $J = 7.0$  Hz, 2H), 4.30 (q,  $J = 7.0$  Hz, 2H), 7.24 (d,  $J = 7.0$  Hz, 2H), 7.36 (m, 3H);  $^{13}\text{C}$  NMR (125 Hz,  $\text{CDCl}_3$ )  $\delta$  13.5, 14.0, 14.1, 26.9, 60.9, 61.0, 121.7, 128.0 (2C), 128.1 (2C), 128.7, 135.7, 161.7, 164.0, 165.1; IR (KBr): 3010, 2925, 1731, 1235  $\text{cm}^{-1}$ ; HRMS (ESI-TOF) calcd for  $\text{C}_{16}\text{H}_{20}\text{O}_4\text{SNa}^+$  ( $[\text{M}+\text{Na}]^+$ ) 331.0975, found 331.0991.

### Dimethyl 2-(benzylthio(phenyl)methylene)malonate (3k)

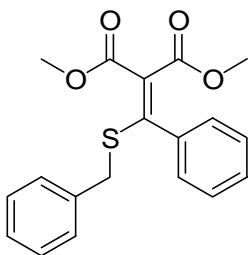

Yellow viscous liquid;  $^1\text{H}$  NMR (500 Hz,  $\text{CDCl}_3$ )  $\delta$  3.38 (s, 3H), 3.48 (s, 2H), 3.81 (s, 3H), 7.01-7.03 (m, 2H), 7.19 (t,  $J = 6.5$  Hz, 5H), 7.37 (d,  $J = 4.5$  Hz, 3H);  $^{13}\text{C}$  NMR (125 Hz,  $\text{CDCl}_3$ )  $\delta$  37.5, 52.0, 52.1, 121.1, 127.3, 128.0 (2C), 128.3 (2C), 128.4 (2C), 128.9 (3C), 135.5, 135.8, 162.2, 164.2, 165.5; IR (KBr): 3026, 2950, 2852, 1735, 1247, 1085  $\text{cm}^{-1}$ ; HRMS (ESI-TOF) calcd for  $\text{C}_{19}\text{H}_{18}\text{O}_4\text{SNa}^+$  ( $[\text{M}+\text{Na}]^+$ ) 365.0818, found 365.0826; Anal. calcd for  $\text{C}_{19}\text{H}_{18}\text{O}_4\text{S}$ : C, 66.65; H, 5.30. Found: C, 66.73; H, 5.25.

### 3-(Benzylthio(phenyl)methylene)pentane-2,4-dione (3l)

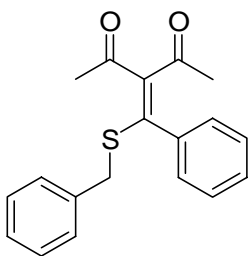

Yellow solid, mp 75-76 °C;  $^1\text{H}$  NMR (500 Hz,  $\text{CDCl}_3$ )  $\delta$  1.69 (s, 3H), 2.28 (s, 3H), 3.50 (s, 2H), 6.98 (d,  $J = 6.0$  Hz, 2H), 7.21 (d,  $J = 6.0$  Hz, 3H), 7.25-7.26 (m, 2H), 7.42-7.44 (m, 3H);  $^{13}\text{C}$  NMR (125 Hz,  $\text{CDCl}_3$ )  $\delta$  30.1, 31.1, 37.6, 127.3, 128.4 (2C), 128.8 (2C), 128.9 (2C), 129.2 (2C), 129.8, 135.5, 136.3, 140.6, 155.3, 197.1, 210.7; IR (KBr): 3058, 2961, 2855, 1680, 1474, 1233  $\text{cm}^{-1}$ . HRMS (ESI-TOF) calcd for  $\text{C}_{19}\text{H}_{19}\text{O}_2\text{S}^+$  ( $[\text{M}+\text{H}]^+$ ) 311.1100, found 311.1117.

**(E) and (Z)-Ethyl 2-(benzylthio(phenyl)methylene)-3-oxobutanoate (3m)**

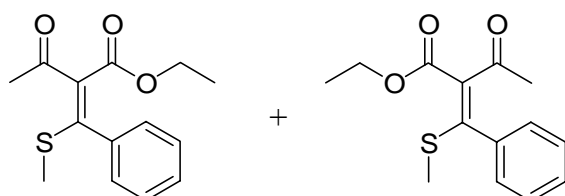

Yellow solid; **One of two isomers:**  $^1\text{H}$  NMR (500 Hz,  $\text{CDCl}_3$ )  $\delta$  0.83 (t,  $J = 7.0$  Hz, 3H), 1.77 (s, 3H), 2.35 (s, 3H), 3.83 (q,  $J = 7.0$  Hz, 2H), 7.17 (t,  $J = 7.5$  Hz, 2H), 7.30-7.43 (m, 3H);  $^{13}\text{C}$  NMR (125 Hz,  $\text{CDCl}_3$ )  $\delta$  13.4, 16.4, 29.1, 60.9, 127.8 (2C), 128.3 (2C), 128.6, 129.0, 135.9, 164.0, 167.2, 193.8; **The other one:**  $^1\text{H}$  NMR (500 Hz,  $\text{CDCl}_3$ )  $\delta$  1.32 (t,  $J = 7.0$  Hz, 3H), 1.81 (s, 3H), 1.96 (s, 3H), 4.30 (q,  $J = 7.0$  Hz, 2H), 7.17 (t,  $J = 7.5$  Hz, 2H), 7.30-7.43 (m, 3H);  $^{13}\text{C}$  NMR (125 Hz,  $\text{CDCl}_3$ )  $\delta$  14.1, 15.9, 30.9, 60.9, 127.8 (2C), 128.3 (2C), 128.6, 129.9, 135.1, 159.8, 164.3, 198.9; HRMS: calcd. For  $\text{C}_{14}\text{H}_{17}\text{O}_3\text{S}^+$  ( $[\text{M}+\text{H}]^+$ ) 265.0893, found 265.0911.

**(E) and (Z)-2-(Benzylthio(phenyl)methylene)-1-phenylbutane-1,3-dione (3n)**

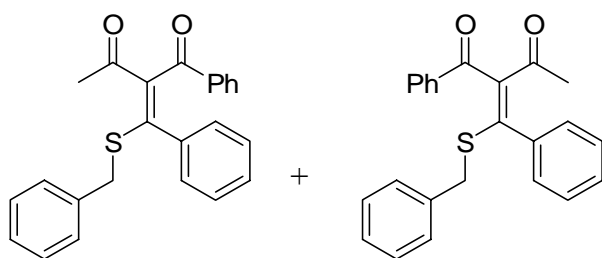

Yellow viscous liquid; **One of two isomers:**  $^1\text{H}$  NMR (500 Hz,  $\text{CDCl}_3$ )  $\delta$  2.23 (s, 3H), 3.46 (s, 2H), 7.00-7.02 (m, 2H), 7.07-7.15 (m, 2H), 7.20-7.22 (m, 2H), 7.23-7.26 (m, 1H), 7.38-7.43 (m, 2H), 7.47-7.49 (m, 2H), 7.56-7.59 (m, 2H), 7.90 (d,  $J = 8.0$  Hz, 2H);  $^{13}\text{C}$  NMR (125 Hz,  $\text{CDCl}_3$ )  $\delta$  29.7, 37.8, 127.3, 128.2 (2C), 128.4 (2C), 128.6 (2C), 128.8 (2C), 129.0 (2C), 129.1 (2C), 129.4, 130.2, 133.1, 133.3, 135.1, 136.1, 137.8, 194.5, 196.5; **The other one:**  $^1\text{H}$  NMR (500 Hz,  $\text{CDCl}_3$ )  $\delta$  1.80 (s, 3H), 3.46 (s, 2H), 6.69 (d,  $J = 4.5$  Hz, 2H), 7.00-7.02 (m, 2H), 7.07-7.15 (m, 2H), 7.20-7.22 (m, 2H), 7.23-7.26 (m, 2H), 7.38-7.43 (m, 2H), 7.56-7.59 (m, 1H), 7.90 (d,  $J = 8.0$  Hz, 2H);  $^{13}\text{C}$  NMR (125 Hz,  $\text{CDCl}_3$ )  $\delta$  29.6, 37.2, 127.2, 128.1 (2C), 128.3 (2C), 128.6 (2C), 128.8 (2C), 129.0 (2C), 129.1 (2C), 129.4, 130.2, 133.1, 133.3, 135.1, 136.1, 137.8, 194.5, 196.5; HRMS (ESI-TOF)



calcd for  $C_{24}H_{21}O_2S^+$  ( $[M+H]^+$ ) 373.1257, found 373.1273.

**(E) and (Z)-Ethyl 3-(methylthio)-2-nitro-3-phenylacrylate (3o)**

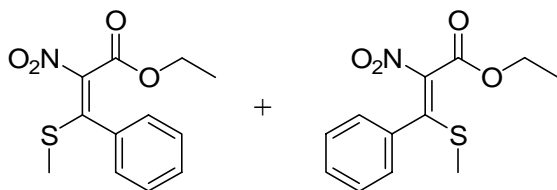

Yellow liquid; **One of two isomers:**  $^1H$  NMR (500 Hz,  $CDCl_3$ )  $\delta$  0.93 (t,  $J = 7.0$  Hz, 3H), 1.88 (s, 3H), 3.97 (q,  $J = 7.0$  Hz, 2H), 7.18-7.23 (m, 2H), 7.43-7.48 (m, 3H);  $^{13}C$  NMR (125 Hz,  $CDCl_3$ )  $\delta$  13.4, 16.6, 62.2, 121.0, 128.4 (2C), 128.8 (2C), 129.3, 132.2, 159.5, 160.6. **The other one:**  $^1H$  NMR (500 Hz,  $CDCl_3$ )  $\delta$  1.34 (t,  $J = 7.0$  Hz, 3H), 1.84 (s, 3H), 4.35 (q,  $J = 7.0$  Hz, 2H), 7.18-7.23 (m, 2H), 7.43-7.48 (m, 3H);  $^{13}C$  NMR (125 Hz,  $CDCl_3$ )  $\delta$  14.0, 16.3, 62.3, 122.0, 127.8, 128.6 (2C), 128.9 (2C), 131.9, 159.4, 160.1; HRMS (ESI-TOF) calcd for  $C_{12}H_{13}NO_4SNa^+$  ( $[M+Na]^+$ ) 290.0457, found 290.0470.

**IV. Synthesis and analytical data of 4a–e**

**General Procedure for the synthesis of Compound 4a–e** (taking **4a** as an example): To a solution of **3b** (185 mg, 0.5 mmol) and  $PhB(OH)_2$  (183 mg, 1.5 mmol) in DMF (4.0 mL) was added  $Cu(OAc)_2$  (27 mg, 0.15 mmol). The reaction mixture was allowed to stir at  $130^\circ C$  for 30 h and monitored by TLC. Then, the reaction mixture was cooled to room temperature and poured into saturated NaCl solution (50 mL). The resulting mixture was extracted with dichloromethane ( $3 \times 20$  mL). The combined organic phase was dried over anhydrous  $MgSO_4$ , filtered, and concentrated in vacuo. Purification was carried out by flash silica gel chromatography using petroleum ether/diethyl ether (50:1, V/V) as eluent to give diethyl 2-(diphenylmethylene)malonate **4a** (76 mg, 47%), benzyl(phenyl)sulfane (45 mg, 45%) and biphenyl (62 mg).

**Diethyl 2-(diphenylmethylene)malonate (4a)<sup>2</sup>**

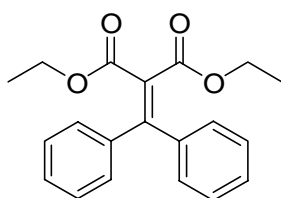

White solid, mp:  $69-71^\circ C$  (lit.  $41-41.5^\circ C$ );  $^1H$  NMR (500 Hz,  $CDCl_3$ )  $\delta$  1.02 (t,  $J = 7.0$  Hz, 6H), 4.07 (q,  $J = 7.0$  Hz, 4H), 7.18-7.20 (m, 4H), 7.31-7.36 (m, 6H);  $^{13}C$  NMR (125 Hz,  $CDCl_3$ )  $\delta$  13.6 (2C), 61.2 (2C), 128.1 (4C), 129.1 (7C), 140.2 (2C), 155.6, 165.9 (2C); IR (KBr): 3050, 2925, 2853,

1723, 1302, 1285  $\text{cm}^{-1}$ ; HRMS (ESI-TOF) calcd for  $\text{C}_{20}\text{H}_{20}\text{O}_4\text{Na}^+$  ( $[\text{M}+\text{Na}]^+$ ) 347.1254, found 347.1261.

### Dimethyl 2-(diphenylmethylene)malonate (4b)<sup>3</sup>

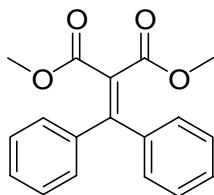

White solid, mp: 115-116 °C (lit. 119-121 °C);  $^1\text{H}$  NMR (500 Hz,  $\text{CDCl}_3$ )  $\delta$  3.61 (s, 6H), 7.18 (d,  $J$  = 6.5 Hz, 4H), 7.32-7.37 (m, 6H);  $^{13}\text{C}$  NMR (125 Hz,  $\text{CDCl}_3$ )  $\delta$  52.2 (2C), 128.2 (5C), 129.0 (4C), 129.3 (2C), 139.9 (2C), 156.5, 166.4 (2C); IR (KBr): 3028, 2950, 1735, 1247  $\text{cm}^{-1}$ ; HRMS (ESI-TOF) calcd for  $\text{C}_{18}\text{H}_{16}\text{O}_4\text{Na}^+$  ( $[\text{M}+\text{Na}]^+$ ) 319.0941, found 319.0949.

### 3-(Diphenylmethylene)pentane-2,4-dione (4c)<sup>4</sup>

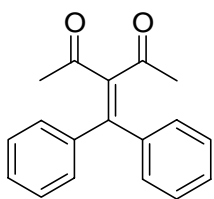

White solid, mp: 116-118 °C (lit. 120-121 °C);  $^1\text{H}$  NMR (500 Hz,  $\text{CDCl}_3$ )  $\delta$  1.94 (s, 6H), 7.18-7.20 (m, 4H), 7.35-7.38 (m, 4H), 7.40-7.42 (m, 2H);  $^{13}\text{C}$  NMR (125 Hz,  $\text{CDCl}_3$ )  $\delta$  31.3 (2C), 128.6 (4C), 129.8 (2C), 130.0 (4C), 139.3 (2C), 143.1, 149.2, 203.6 (2C); IR (KBr): 3061, 3028, 2923, 2852, 1695, 12873  $\text{cm}^{-1}$ ; HRMS (ESI-TOF) calcd for  $\text{C}_{18}\text{H}_{16}\text{O}_2\text{Na}^+$  ( $[\text{M}+\text{Na}]^+$ ) 287.1043, found 287.1046.

### Diethyl 2-((4-chlorophenyl)(phenyl)methylene)malonate (4d)

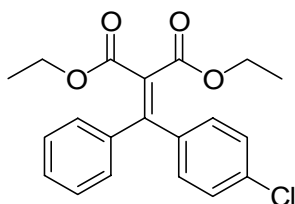

White solid, mp: 89-90 °C;  $^1\text{H}$  NMR (500 Hz,  $\text{CDCl}_3$ )  $\delta$  1.02 (t,  $J$  = 7.0 Hz, 3H), 1.09 (t,  $J$  = 7.0 Hz, 3H), 4.05-4.13 (m, 4H), 7.12-7.18 (m, 4H), 7.30-7.37 (m, 5H);  $^{13}\text{C}$  NMR (125 Hz,  $\text{CDCl}_3$ )  $\delta$  13.6, 13.7, 61.3, 61.4, 126.9, 128.2 (2C), 128.4 (2C), 129.1 (2C), 129.3, 130.5 (2C), 135.4, 138.5, 139.7, 154.2, 165.6, 165.7; IR (KBr): 3021, 2980, 29312, 1725, 1296  $\text{cm}^{-1}$ ; HRMS (ESI-TOF) calcd for  $\text{C}_{20}\text{H}_{19}\text{ClO}_4\text{Na}^+$  ( $[\text{M}+\text{Na}]^+$ ) 381.0864, found 381.0869; Anal. calcd for  $\text{C}_{20}\text{H}_{19}\text{ClO}_4$ : C, 66.95; H, 5.34. Found: C, 66.81; H, 5.39.

**Dimethyl 2-((4-chlorophenyl)(phenyl)methylene)malonate (4e)**

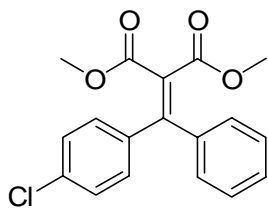

White solid, mp: 82-83 °C;  $^1\text{H}$  NMR (500 Hz,  $\text{CDCl}_3$ )  $\delta$  3.61 (s, 3H), 3.65 (s, 3H), 7.11-7.16 (m, 4H), 7.30-7.37 (m, 5H);  $^{13}\text{C}$  NMR (125 Hz,  $\text{CDCl}_3$ )  $\delta$  52.2, 52.3, 127.3, 128.3 (2C), 128.5 (2C), 129.0 (2C), 129.5, 130.4 (2C), 135.5, 138.3, 139.6, 155.1, 166.0, 166.1; IR (KBr): 3025, 2946, 1746, 1285  $\text{cm}^{-1}$ ; HRMS (ESI-TOF) calcd for  $\text{C}_{18}\text{H}_{16}\text{ClO}_4^+$  ( $[\text{M}+\text{H}]^+$ ) 331.0732, found 331.0735; Anal. calcd for  $\text{C}_{18}\text{H}_{15}\text{ClO}_4$ : C, 65.36; H, 4.57. Found: C, 65.43; H, 4.47.

**V. References**

- 1 (a) M. Wang, L. Ai, J. Zhang, Q. Liu, L. Gao. *Chin. J. Chem.* **2002**, 20, 1591; (b) Y. Liu, M. Wang, H. Yuan, Q. Liu, Q. *Adv. Synth. Catal.* **2010**, 352, 884.
- 2 X. L. Liu, X. Yang, M. Sun, X. H. Liu, R. Zhao, F. M. Liao, *Acta Chim. Sinica* **2002**, 60, 487.
- 3 G. Mlostón, H. Heimgartner, *Helv. Chim. Acta.* **1996**, 79, 1785.
- 4 S. Motoki, C. Urakawa, A. Kano, Y. Fushimi, T. Hirano, K. Murata, *Bull. Chem. Soc. Japan* **1970**, 43, 809.

## VI. Copies of NMR spectra for compounds 3a–l and 4a–e

### 3a

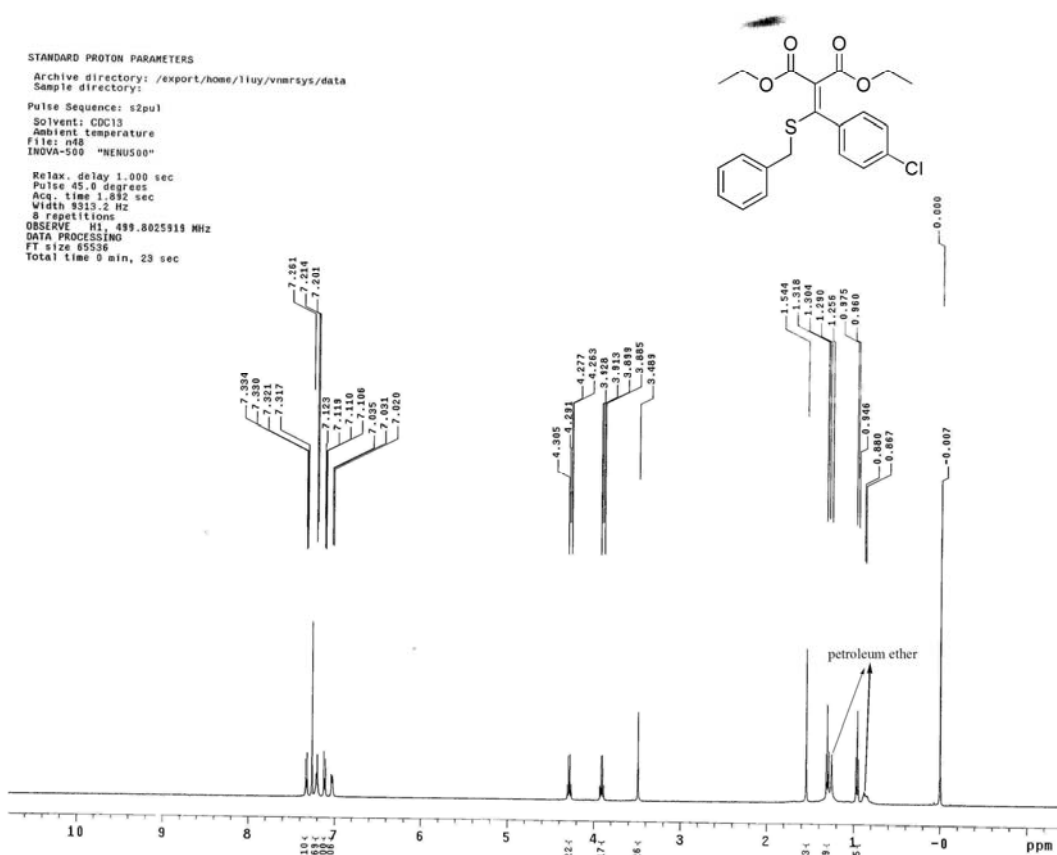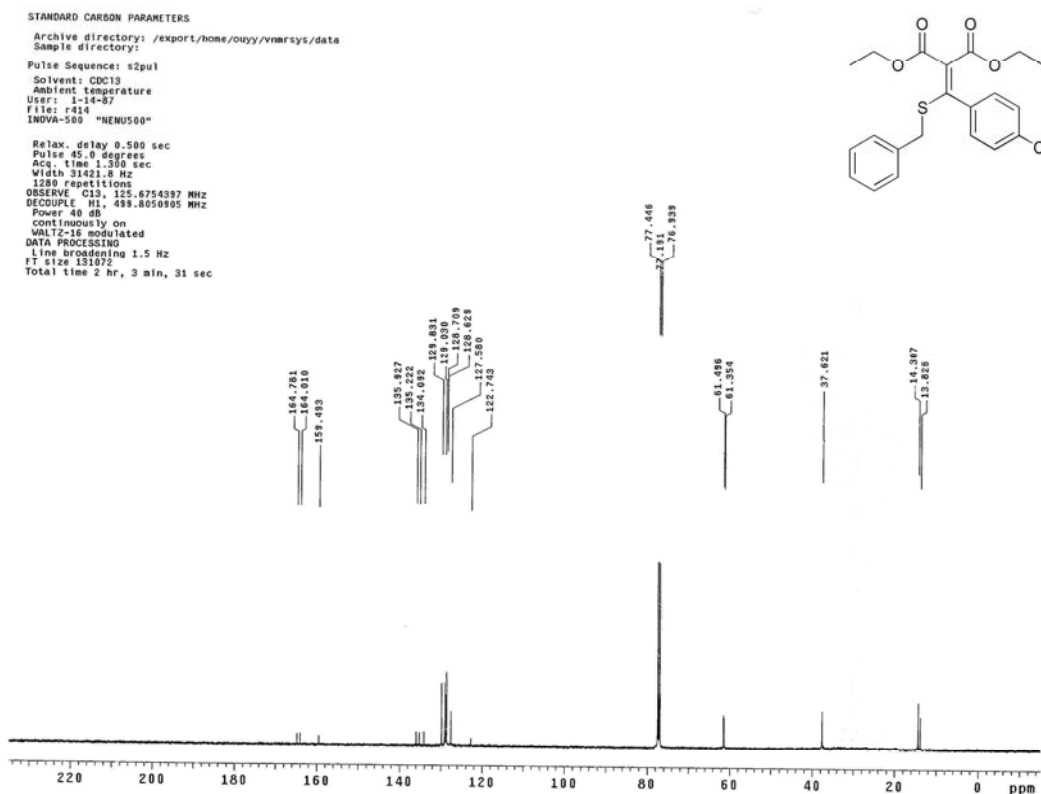

3b

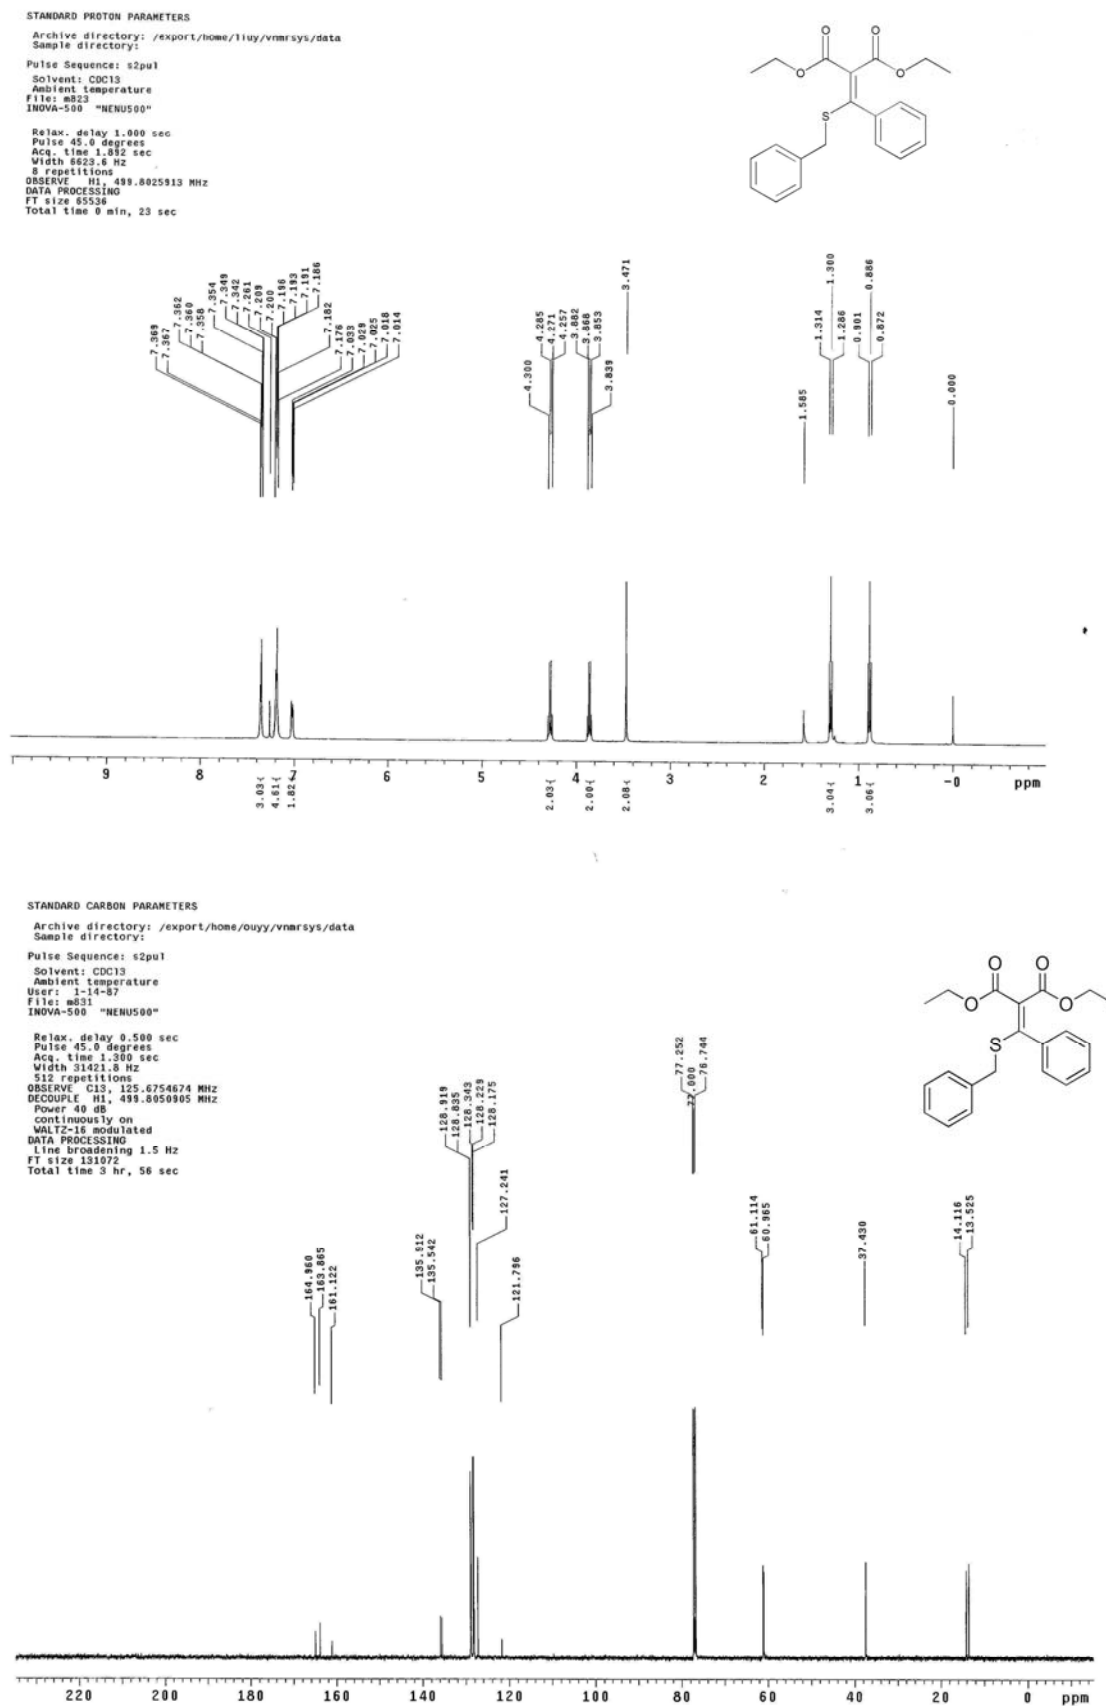

3c

STANDARD PROTON PARAMETERS

Archive directory: /export/home/ouyy/vnmrsys/data  
Sample directory:

Pulse Sequence: s2pu1

Solvent: CDCl<sub>3</sub>

Ambient temperature

File: r556

INOVA-500 "NENUS00"

Relax. delay 1.000 sec

Pulse 45.0 degrees

Acq. time 1.052 sec

Width 8988.8 Hz

8 repetitions

OBSERVE H1, 499.8025898 MHz

DATA PROCESSING

FT size 65536

Total time 0 min, 23 sec

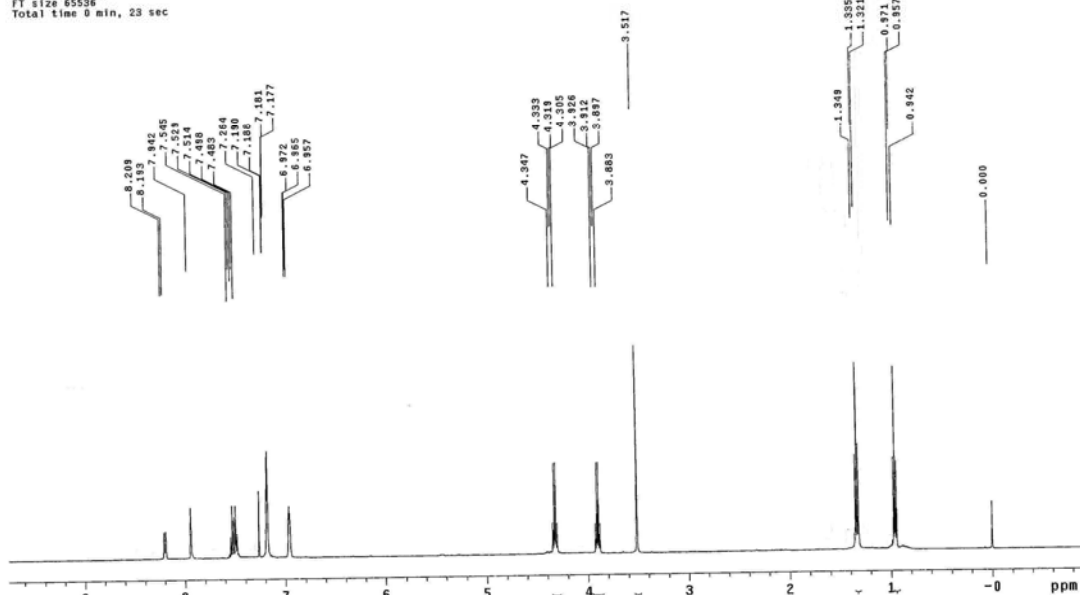

STANDARD CARBON PARAMETERS

Archive directory: /export/home/ouyy/vnmrsys/data  
Sample directory:

Pulse Sequence: s2pu1

Solvent: CDCl<sub>3</sub>

Ambient temperature

User: 1-14-87

File: r561

INOVA-500 "NENUS00"

Relax. delay 0.500 sec

Pulse 45.0 degrees

Acq. time 1.300 sec

Width 31421.8 Hz

784 repetitions

OBSERVE C13, 125.6754642 MHz

DECOUPLE H1, 499.8050905 MHz

Power 40 dB

continuously on

WALTZ-16 modulated

DATA PROCESSING

Line broadening 1.5 Hz

FT size 131072

Total time 2 hr, 3 min, 31 sec

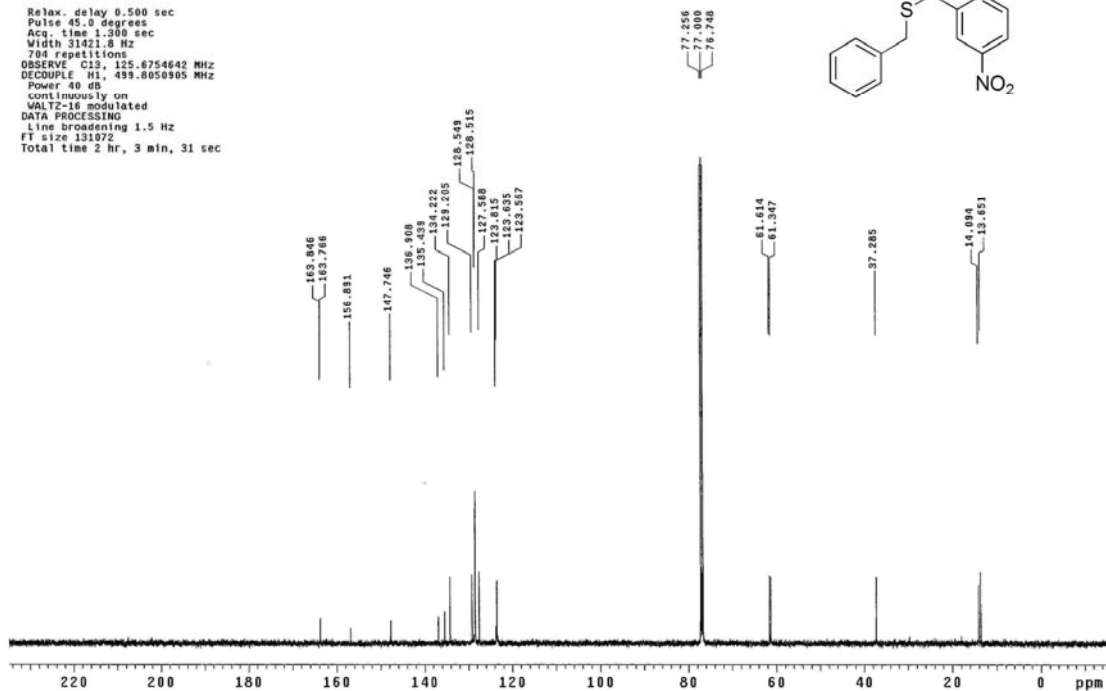

3d

STANDARD PROTON PARAMETERS

Archive directory: /export/home/liuy/vnmr/sys/data  
Sample directory:

Pulse Sequence: s2pul

Solvent: CDCl<sub>3</sub>

Ambient temperature

File: n35

INOVA-500 "NENU500"

Relax. delay 1.000 sec

Pulse 45.0 degrees

Acq. time 1.852 sec

Width 9315.2 Hz

8 repetitions

OBSERVE N1, 499.8025922 MHz

DATA PROCESSING

FT size 45536

Total time 0 min, 23 sec

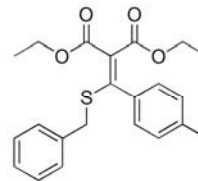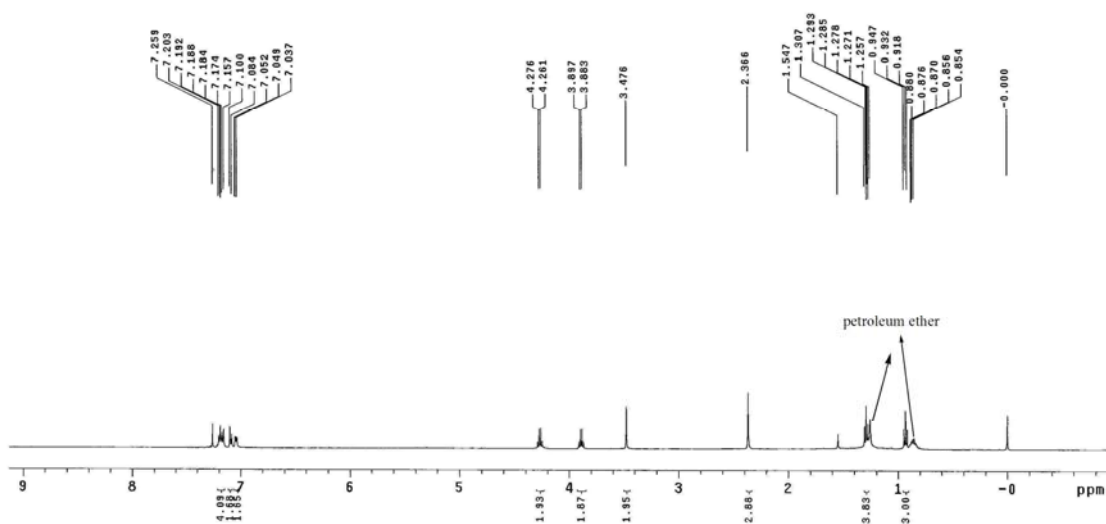

STANDARD CARBON PARAMETERS

Archive directory: /export/home/ouyy/vnmr/sys/data  
Sample directory:

Pulse Sequence: s2pul

Solvent: CDCl<sub>3</sub>

Ambient temperature

User: 1-14-87

File: r415

INOVA-500 "NENU500"

Relax. delay 0.500 sec

Pulse 45.0 degrees

Acq. time 1.389 sec

Width 31421.8 Hz

640 repetitions

OBSERVE C13, 125.6754627 MHz

DECOUPLE N1, 499.8050905 MHz

Power 40 dB

continuously on

WALTZ-16 modulated

DATA PROCESSING

Line broadening 1.5 Hz

FT size 131072

Total time 3 hr, 56 sec

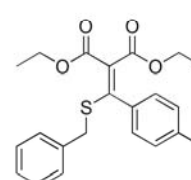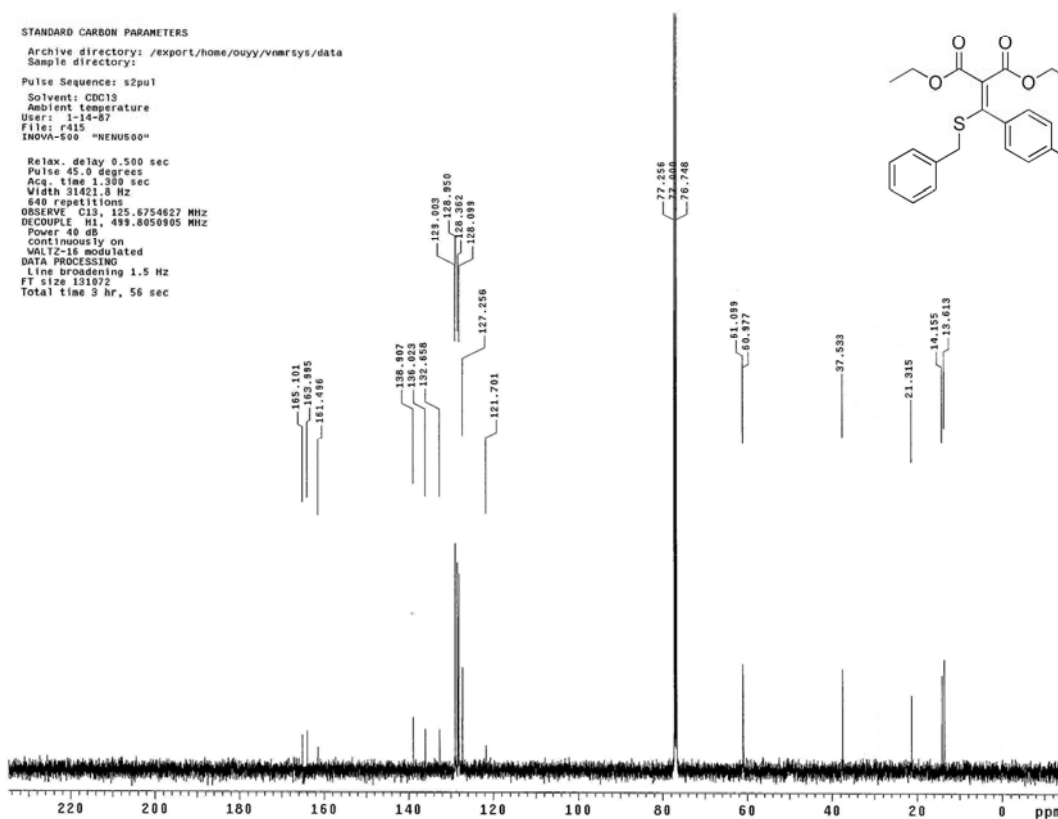

3e

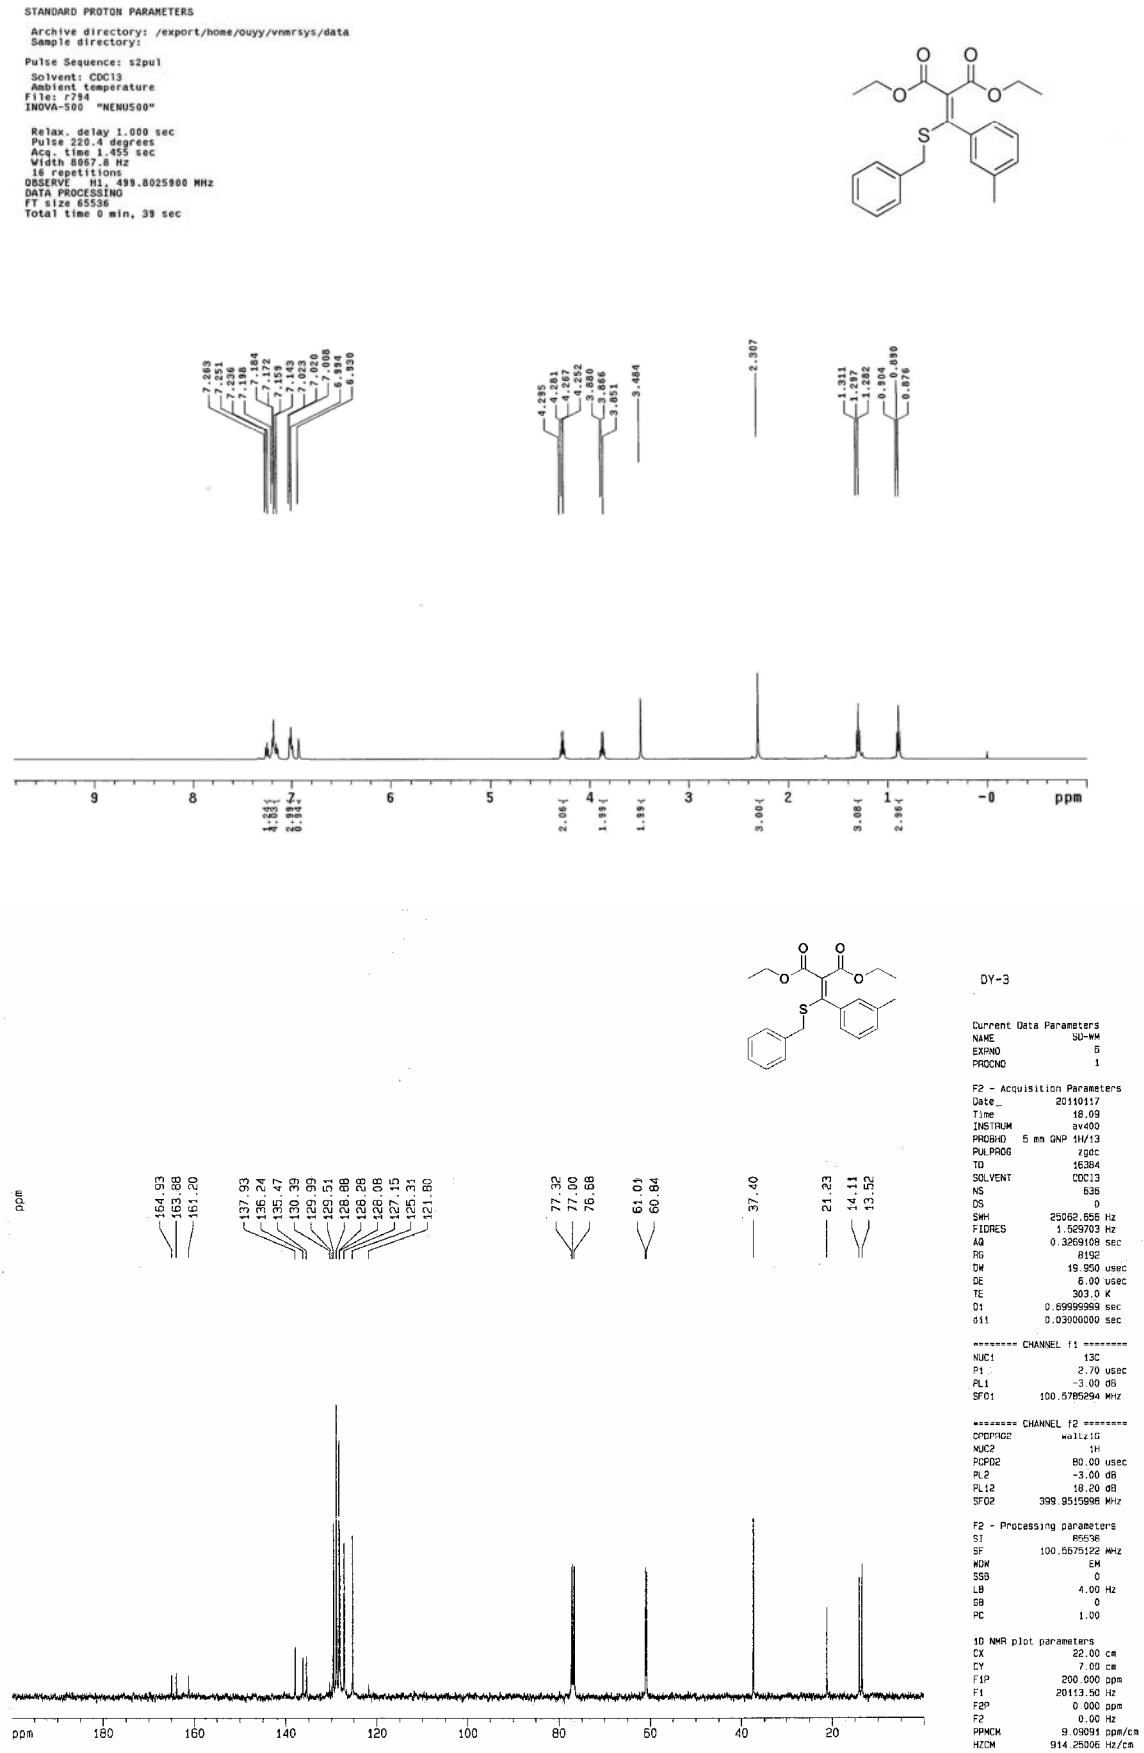



3f

# STANDARD PROTON PARAMETERS

Archive directory: /export/home/ouyy/vnmrsys/data  
Sample directory:

Pulse Sequence: s2pul

Solvent: CDCl3

Ambient temperature

File: r707

INOVA-500 "HENU500"

Relax. delay 1.000 sec

Pulse 220.4 degrees

Acq. time 1.092 sec

Width 7996.8 Hz

16 repetitions

OBSERVE H1, 499.8025914 MHz

DATA PROCESSING

FT size 65536

Total time 0 min, 46 sec

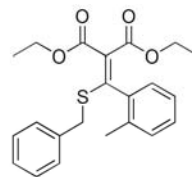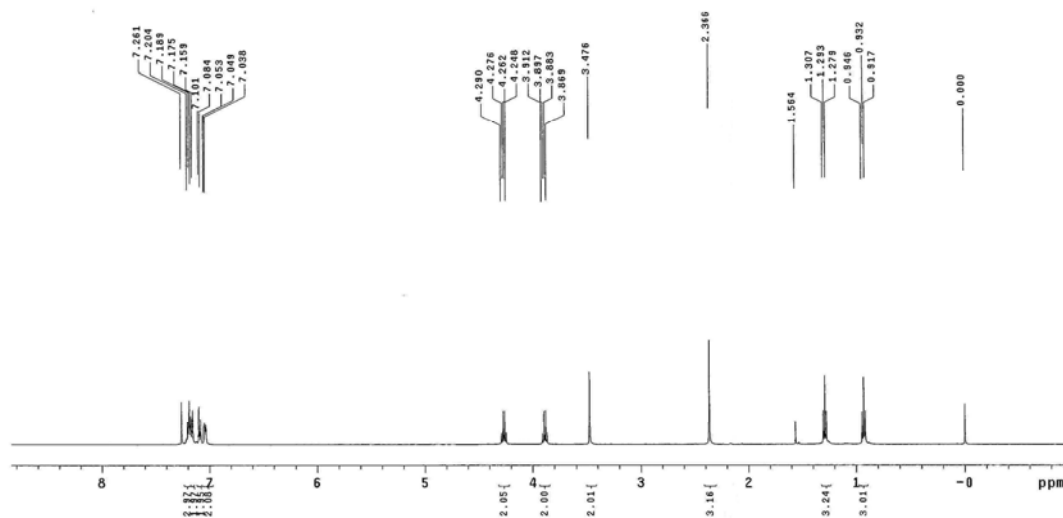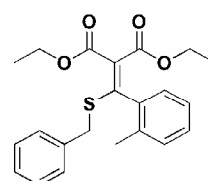

DY-2

Current Data Parameters  
NAME SD-NM  
EXPNO 5  
PROCNO 1

## F2 - Acquisition Parameters

Date\_ 20110117  
Time 17.32  
INSTRUM av400  
PROBHD 5 mm QNP 1H/13  
PULPROG zgpg  
TD 16384  
SOLVENT CDCl3  
NS 2036  
DS 0  
SWH 25062.656 Hz  
FIDRES 1.529703 Hz  
AQ 0.3268108 sec  
RG 6132  
DW 19.950 usec  
DE 5.00 usec  
TE 303.0 K  
d1 0.69999999 sec  
d11 0.03000000 sec

----- CHANNEL f1 -----  
NUC1 13C  
P1 2.70 usec  
PL1 -3.00 dB  
SF01 100.5785294 MHz

----- CHANNEL f2 -----  
CPDPRG2 waltz16  
NUC2 1H  
PCPD2 80.00 usec  
PL2 -3.00 dB  
PL12 18.20 dB  
SF02 399.9515998 MHz

F2 - Processing parameters  
SI 65536  
SF 100.5676087 MHz  
WDW EM  
SSB 0  
LB 4.00 Hz  
GB 0  
PC 1.00

1D NMR plot parameters  
CX 22.00 cm  
CY 7.00 cm  
F1P 209.012 ppm  
F1 21019.79 Hz  
F2P -3.400 ppm  
F2 -341.91 Hz  
PPMCM 9.65507 ppm/cm  
HZCM 970.98621 Hz/cm

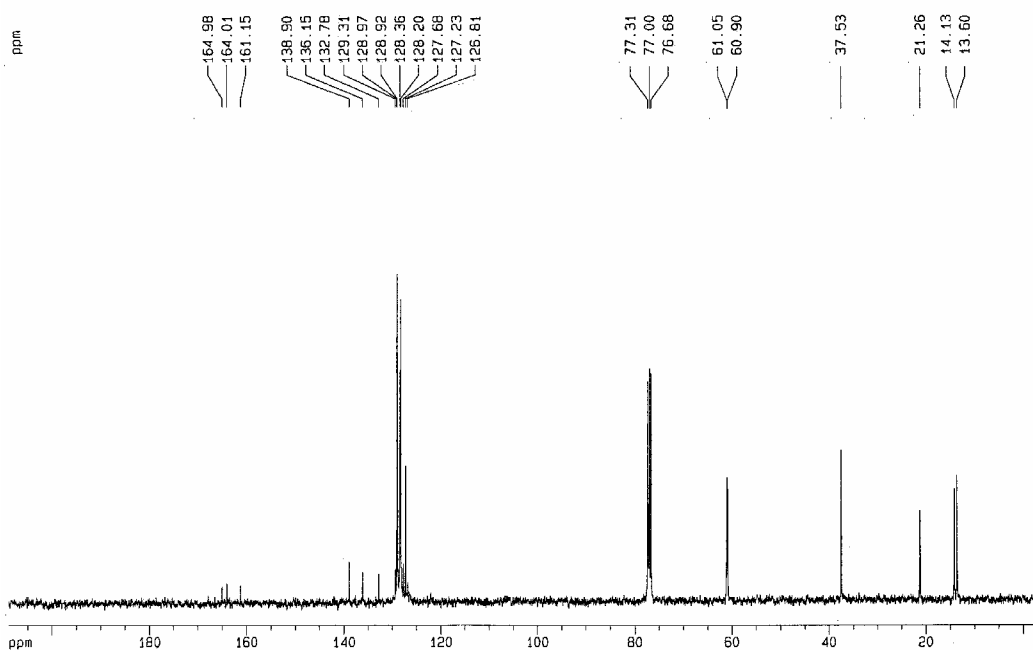

3g

STANDARD PROTON PARAMETERS

Archive directory: /export/home/ouyy/vnmrsys/data  
Sample directory:

Pulse Sequence: s2pul

Solvent: CDCl<sub>3</sub>

Ambient temperature

File: r571

INOVA-500 "NENU500"

Relax. delay 1.000 sec

Pulse 45.0 degrees

Acq. time 1.892 sec

Width 8889.8 Hz

8 repetitions

OBSERVE H1, 499.8025939 MHz

DATA PROCESSING

FT size 65536

Total time 8 min, 23 sec

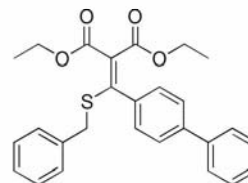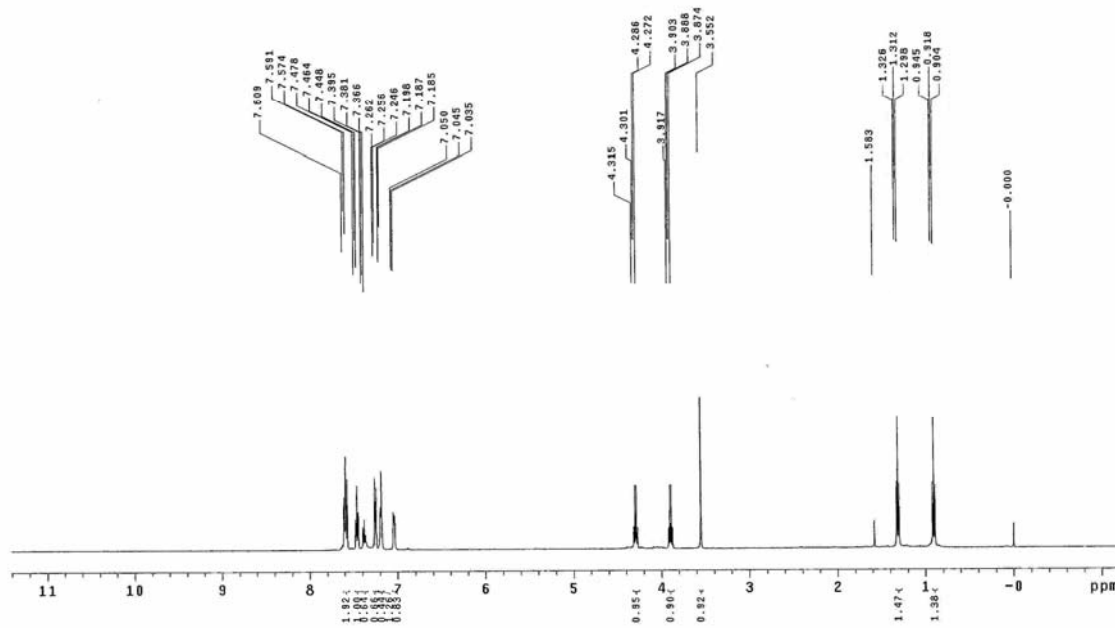

STANDARD CARBON PARAMETERS

Archive directory: /export/home/ouyy/vnmrsys/data  
Sample directory:

Pulse Sequence: s2pul

Solvent: CDCl<sub>3</sub>

Ambient temperature

User: 1-14-87

File: r578

INOVA-500 "NENU500"

Relax. delay 0.500 sec

Pulse 45.0 degrees

Acq. time 1.300 sec

Width 31421.8 Hz

256 repetitions

OBSERVE C13, 125.8754661 MHz

DECOUPLE H1, 499.8050905 MHz

Power 40 dB

continuously on

WALTZ-16 modulated

DATA PROCESSING

Line broadening 1.5 Hz

FT size 131072

Total time 2 hr, 3 min, 31 sec

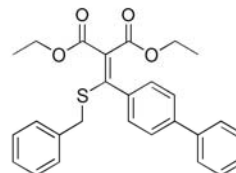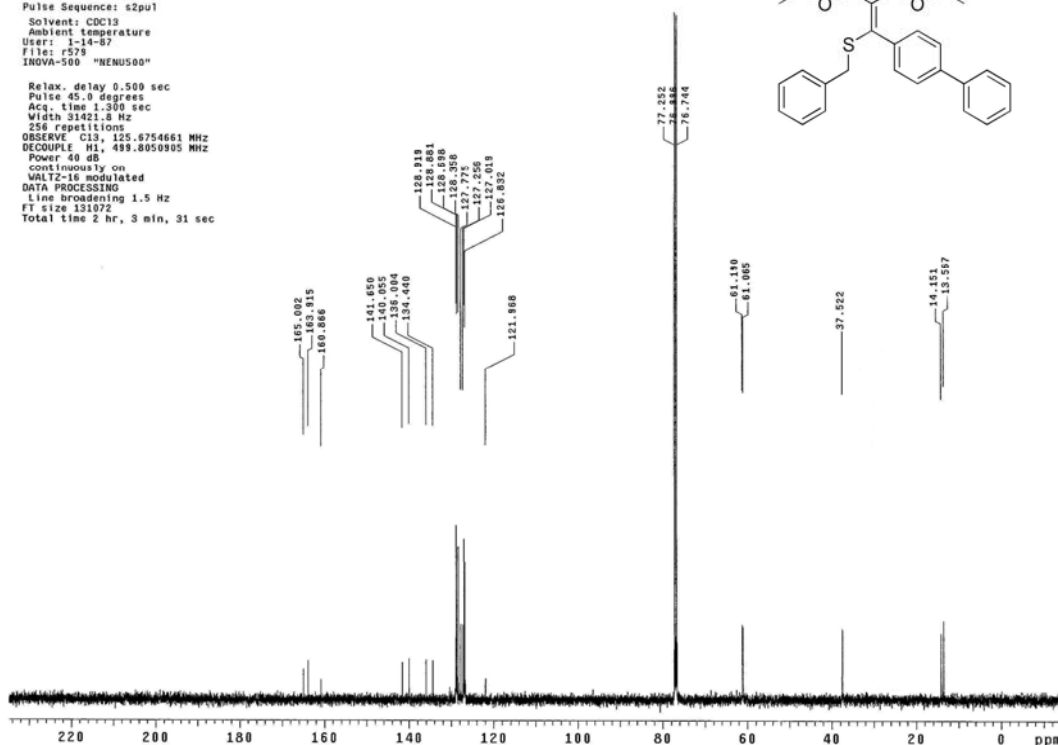

3h

STANDARD PROTON PARAMETERS

Archive directory: /export/home/ouyy/vnmr/sys/data  
Sample directory:

Pulse Sequence: s2pul

Solvent: CDCl<sub>3</sub>

Ambient temperature

File: r272

INNOVA-500 "NENU500"

Relax. delay 1.000 sec

Pulse 45.0 degrees

Acq. time 1.892 sec

Width 8989.8 Hz

8 repetitions

OBSERVE H1, 499.8025925 MHz

DATA PROCESSING

FT size 65536

Total time 8 min, 23 sec

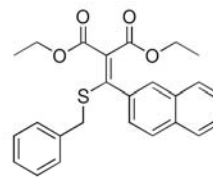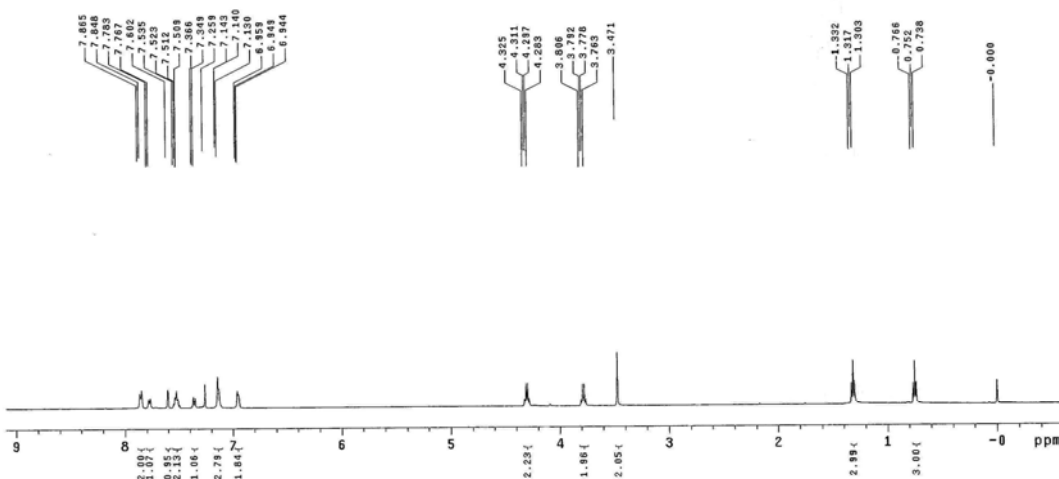

STANDARD CARBON PARAMETERS

Archive directory: /export/home/ouyy/vnmr/sys/data  
Sample directory:

Pulse Sequence: s2pul

Solvent: CDCl<sub>3</sub>

Ambient temperature

User: 1-14-87

File: r294

INNOVA-500 "NENU500"

Relax. delay 0.500 sec

Pulse 45.0 degrees

Acq. time 1.300 sec

Width 31421.8 Hz

1624 repetitions

OBSERVE C13, 125.6754646 MHz

DECOUPLE H1, 499.8050305 MHz

Power 40 dB

continuously on

WALTZ-16 modulated

DATA PROCESSING

Line broadening 1.5 Hz

FT size 131072

Total time 3 hr, 56 sec

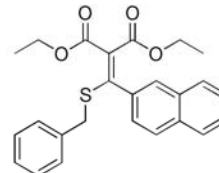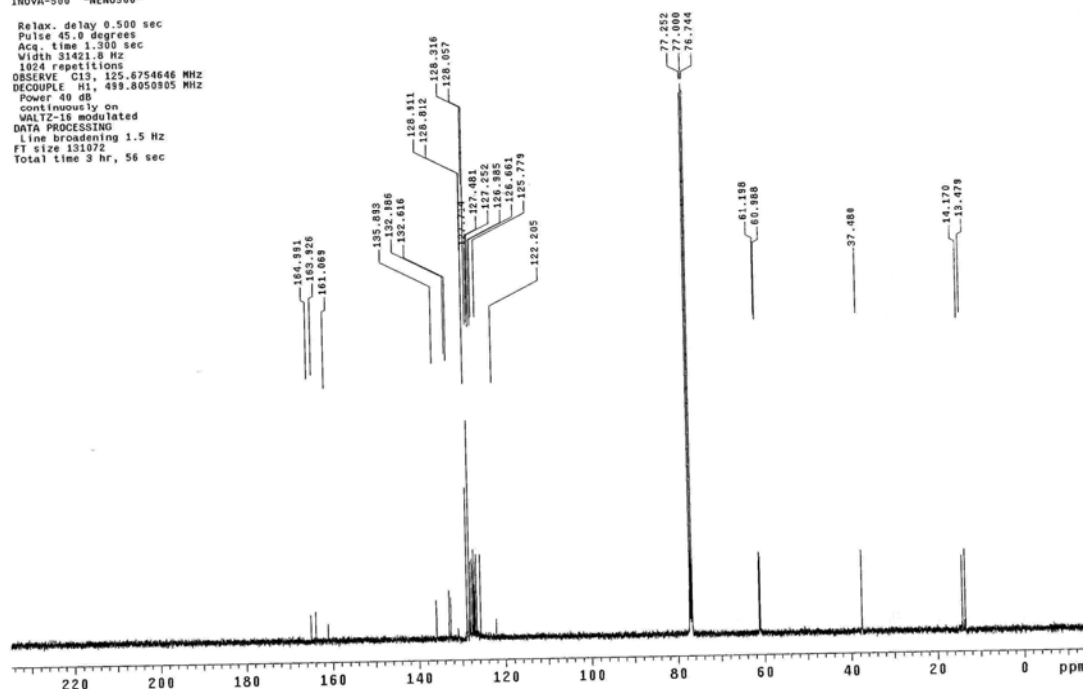

3i

# STANDARD PROTON PARAMETERS

Archive directory: /export/home/ouyy/vnmrsys/data  
Sample directory:

Pulse Sequence: s2pul

Solvent: CDCl<sub>3</sub>

Ambient temperature

File: t051

INNOVA-500 "MENU500"

Relax. delay 1.000 sec

Pulse 220.4 degrees

Acq. time 1.455 sec

Width 1052.0 Hz

8 repetitions

OBSERVE R1, 499.8025873 MHz

DATA PROCESSING

FT size 65536

Total time 0 min, 19 sec

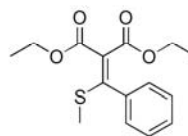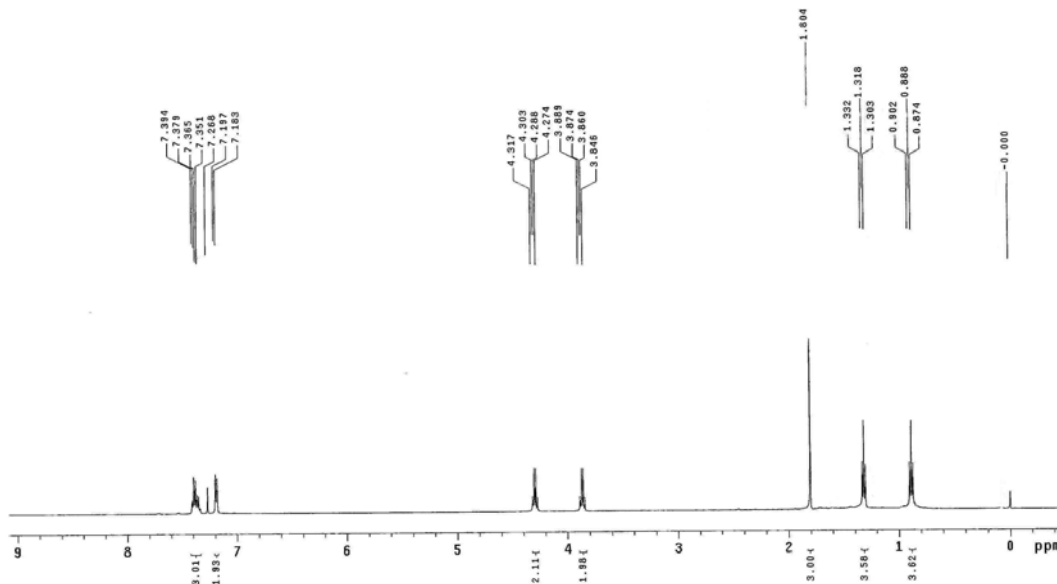

# STANDARD CARBON PARAMETERS

Archive directory: /export/home/ouyy/vnmrsys/data

Sample directory:

Pulse Sequence: s2pul

Solvent: CDCl<sub>3</sub>

Ambient temperature

User: 1-14-87

File: t057

INNOVA-500 "MENU500"

Relax. delay 0.500 sec

Pulse 45.0 degrees

Acq. time 1.360 sec

Width 31421.0 Hz

320 repetitions

OBSERVE C13, 125.6754661 MHz

DECOUPLE R1, 499.8050905 MHz

Power 40 dB

continuously on

WALTZ-16 modulated

DATA PROCESSING

Line broadening 1.5 Hz

FT size 131072

Total time 3 hr, 56 sec

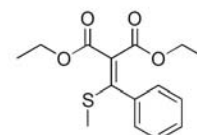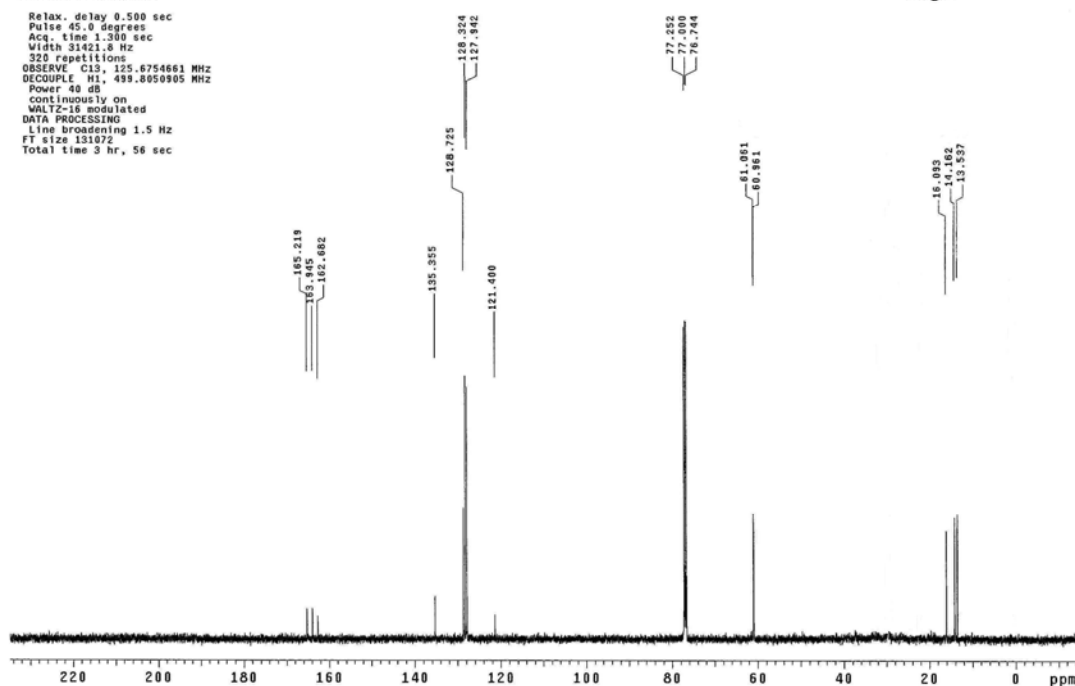

3j

# STANDARD PROTON PARAMETERS

Archive directory: /export/home/ouyy/vnmrsys/data  
Sample directory:

Pulse Sequence: s2pul

Solvent: CDCl<sub>3</sub>

Ambient temperature

File: r154-1

INOVA-500 "MENU500"

Relax. delay 1.000 sec

Pulse 45.0 degrees

Acq. time 1.852 sec

Width 8888.8 Hz

Single scan

OBSERVE H1, 499.8025859 MHz

DATA PROCESSING

FT size 85538

Total time 0 min, 2 sec

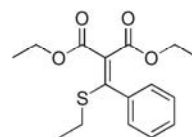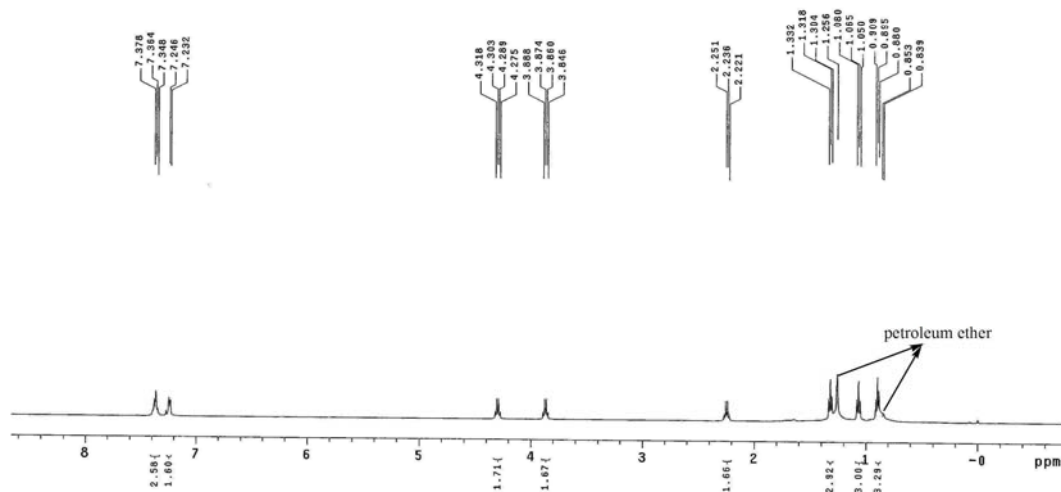

# STANDARD CARBON PARAMETERS

Archive directory: /export/home/ouyy/vnmrsys/data

Sample directory:

Pulse Sequence: s2pul

Solvent: CDCl<sub>3</sub>

Ambient temperature

Upors: 1-14.87

File: r154

INOVA-500 "MENU500"

Relax. delay 0.500 sec

Pulse 45.0 degrees

Acq. time 1.300 sec

Width 31421.8 Hz

256 repetitions

OBSERVE C13, 125.6754670 MHz

DECOUPLE H1, 499.8050905 MHz

Power 40 dB

continuously on

WALTZ-16 modulated

DATA PROCESSING

Line broadening 1.5 Hz

FT size 131072

Total time 3 hr, 56 sec

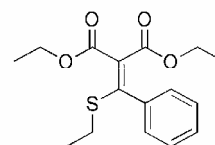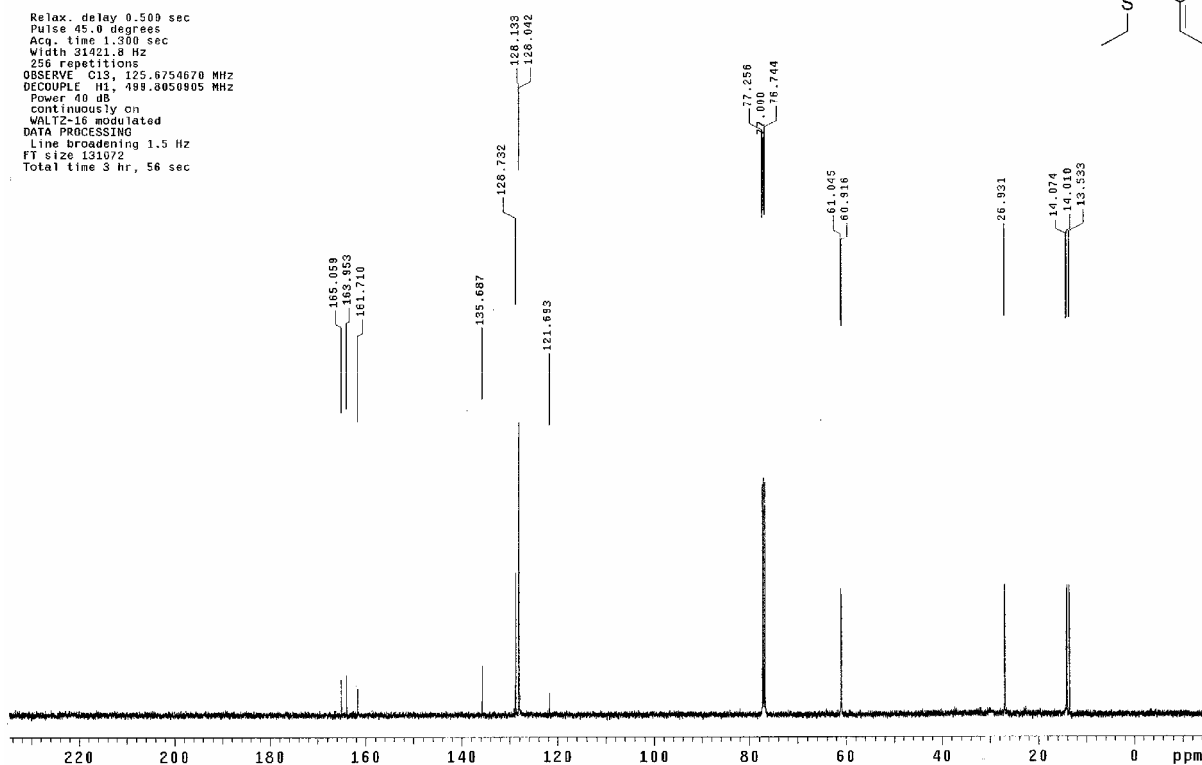

3k

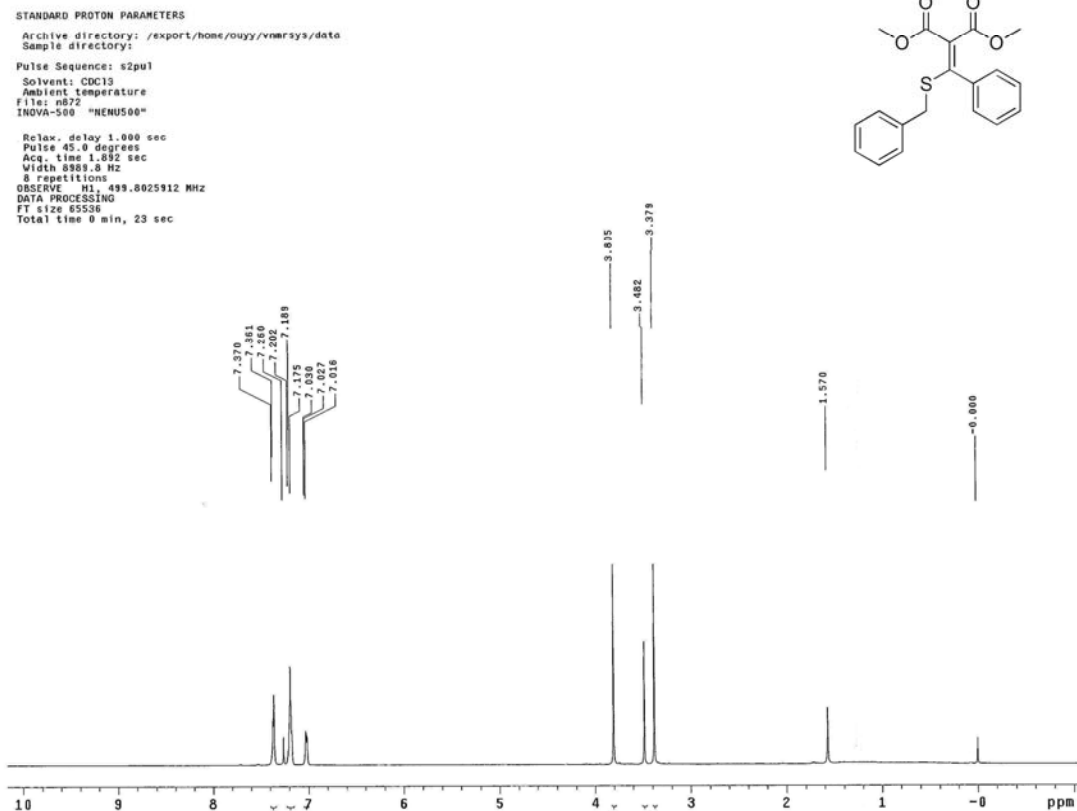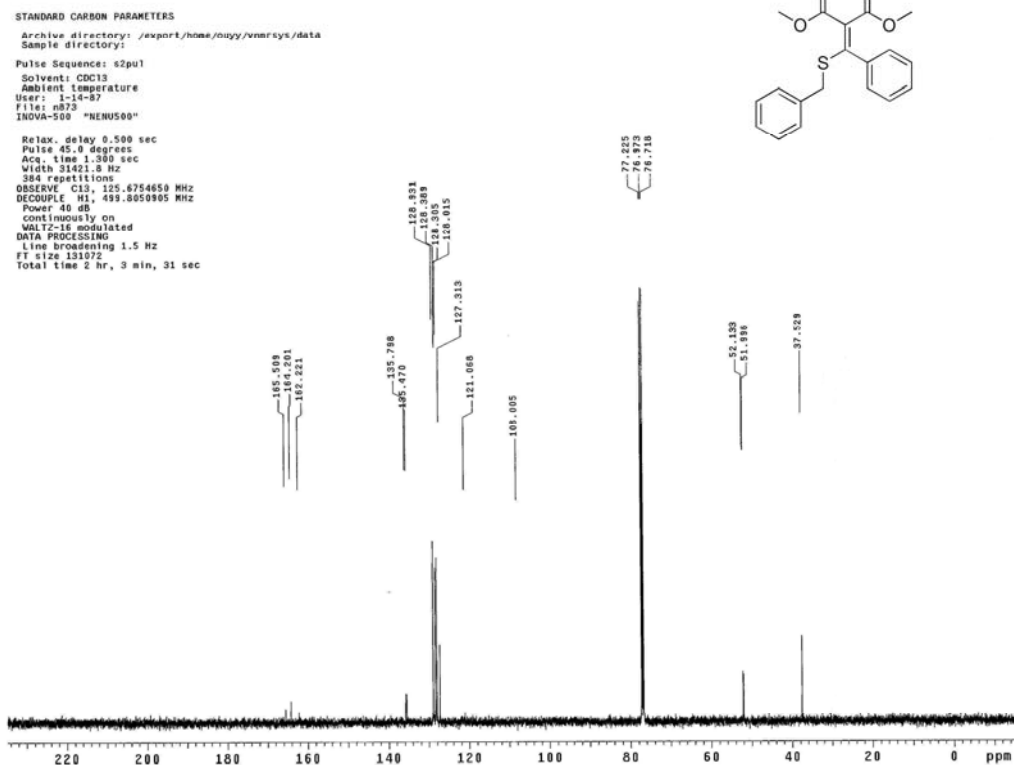

31

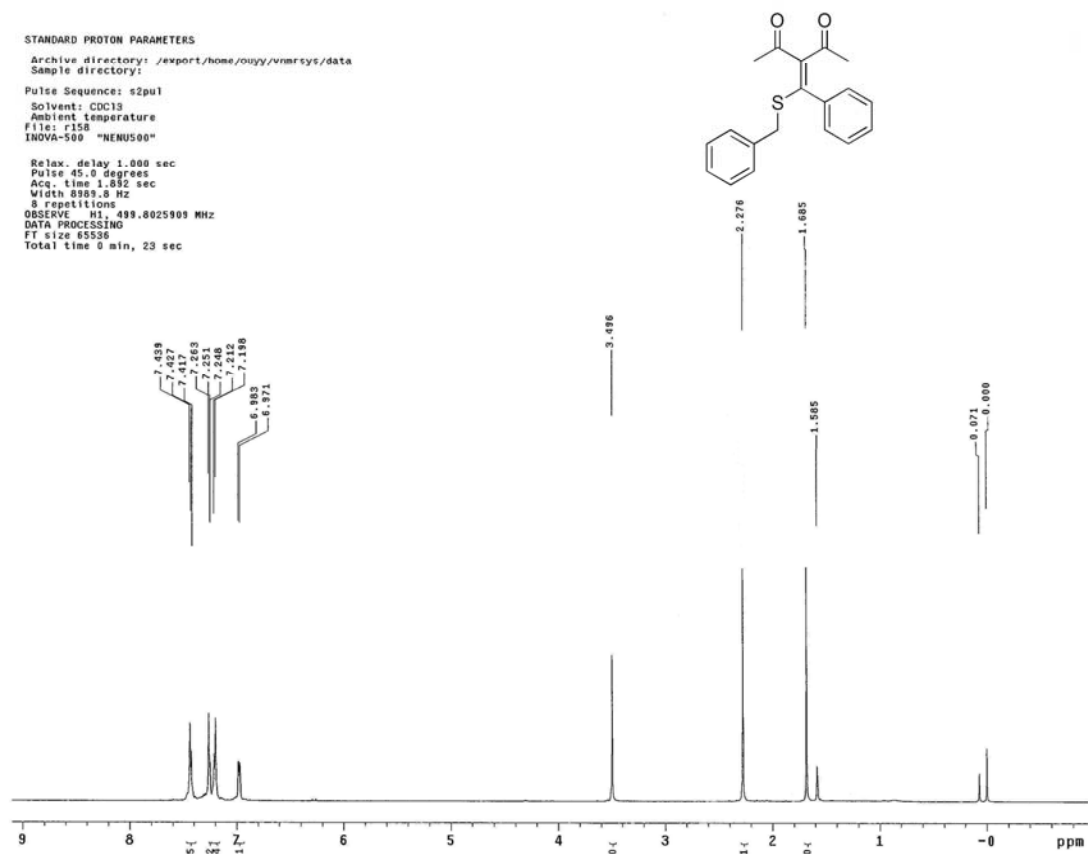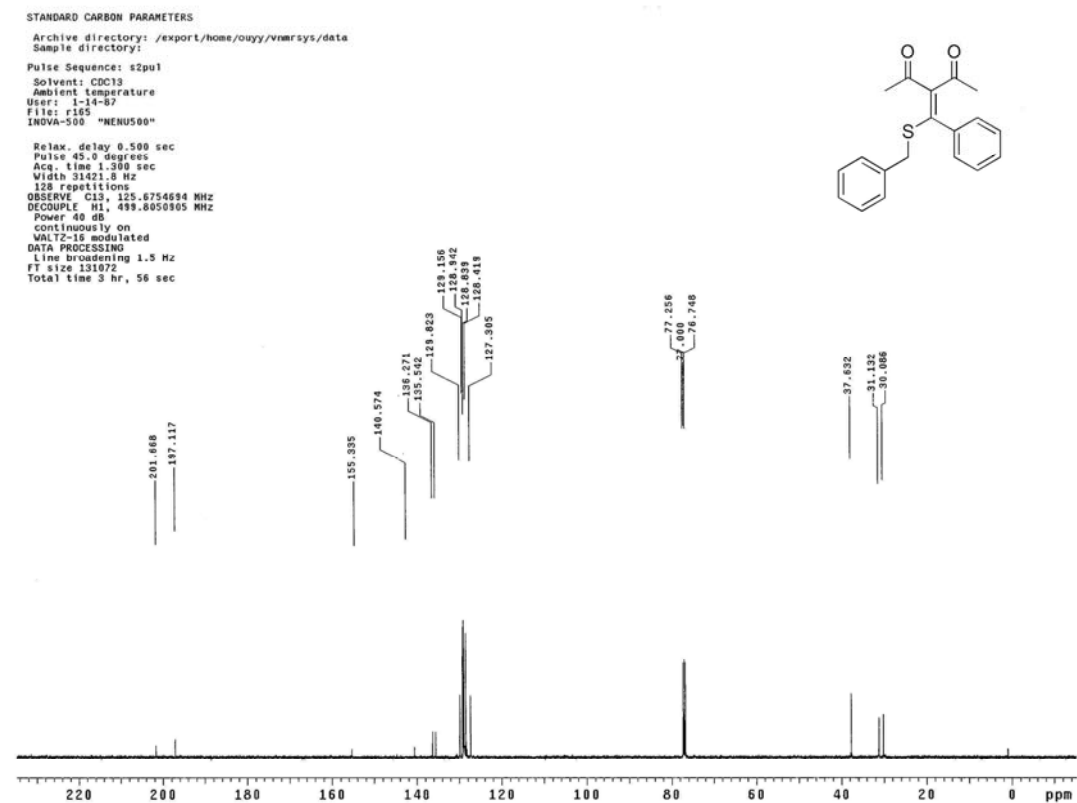

3m

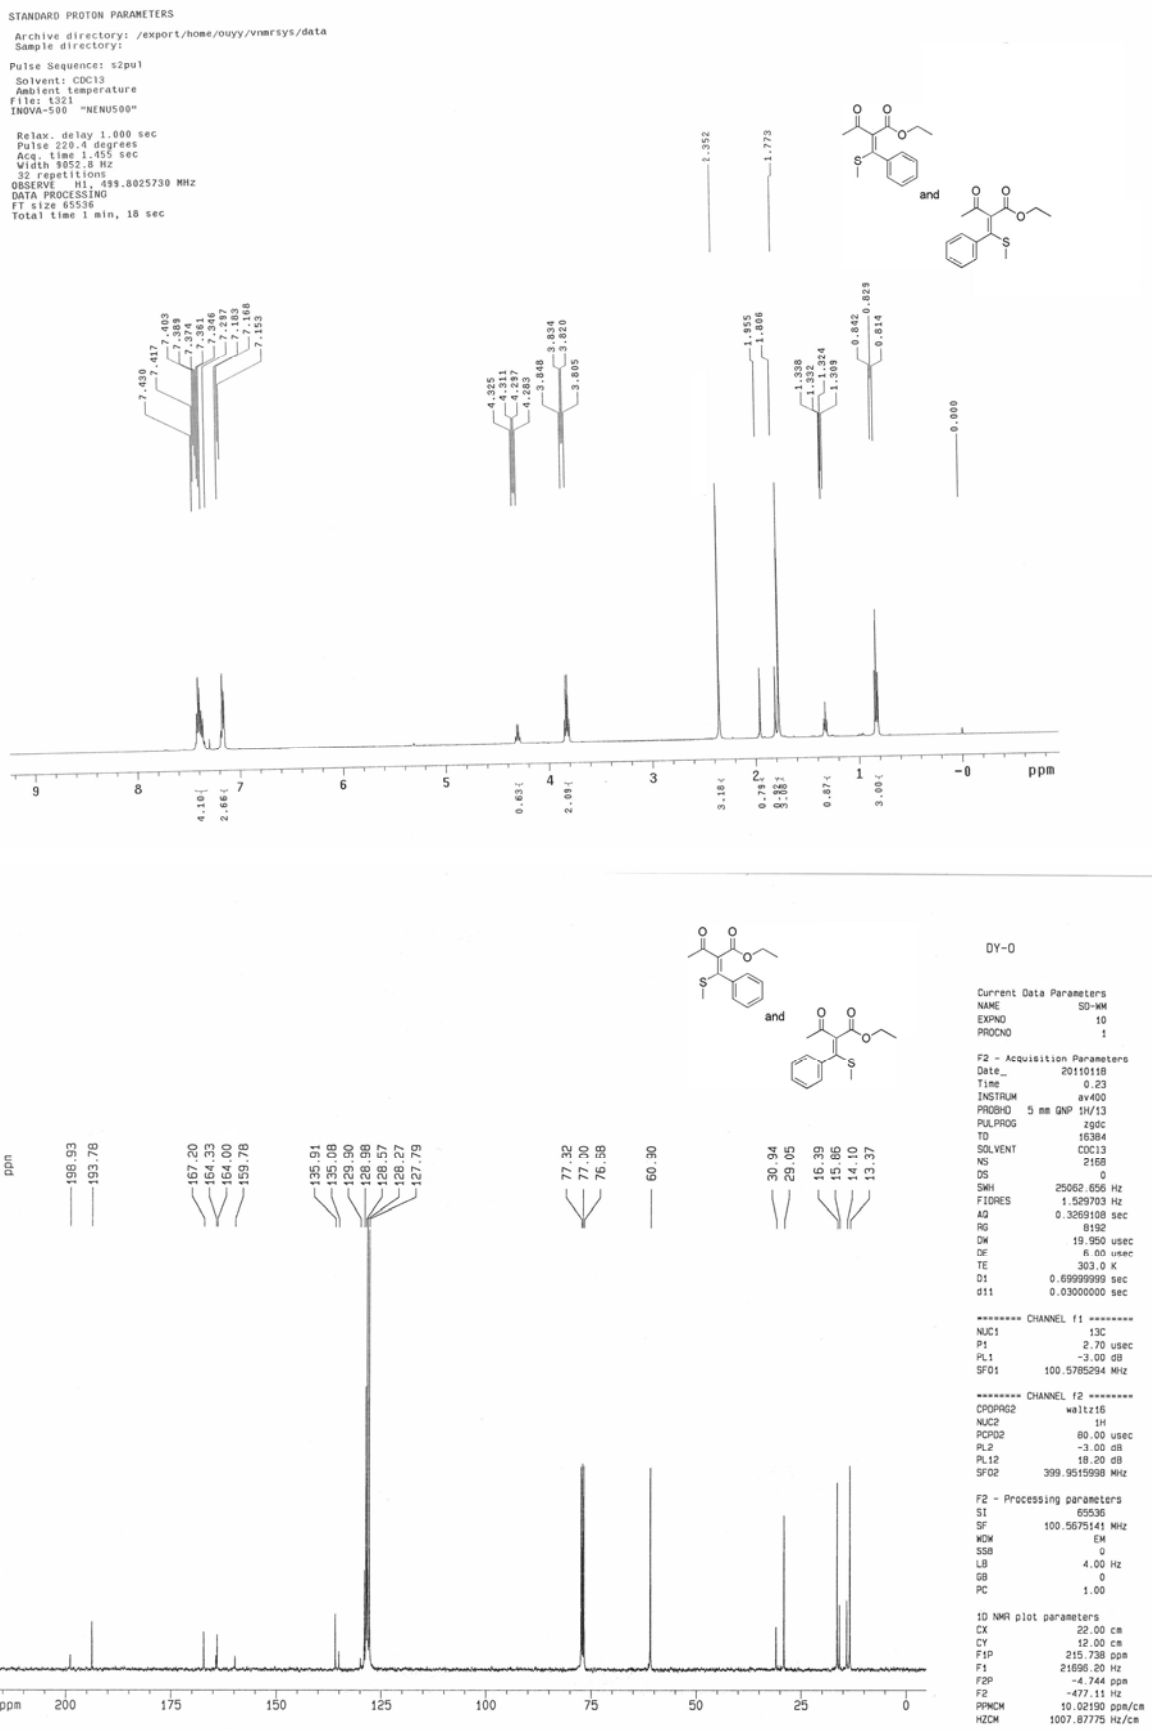



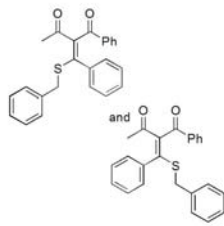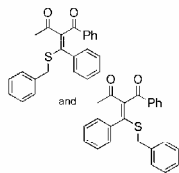

30

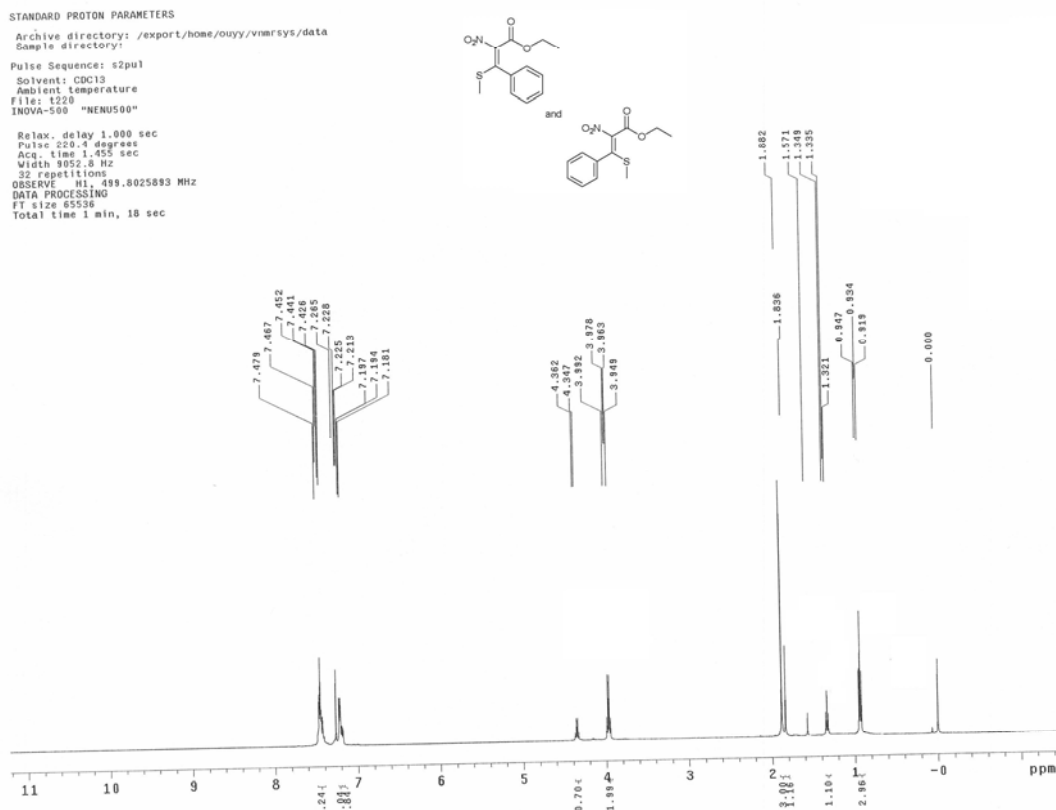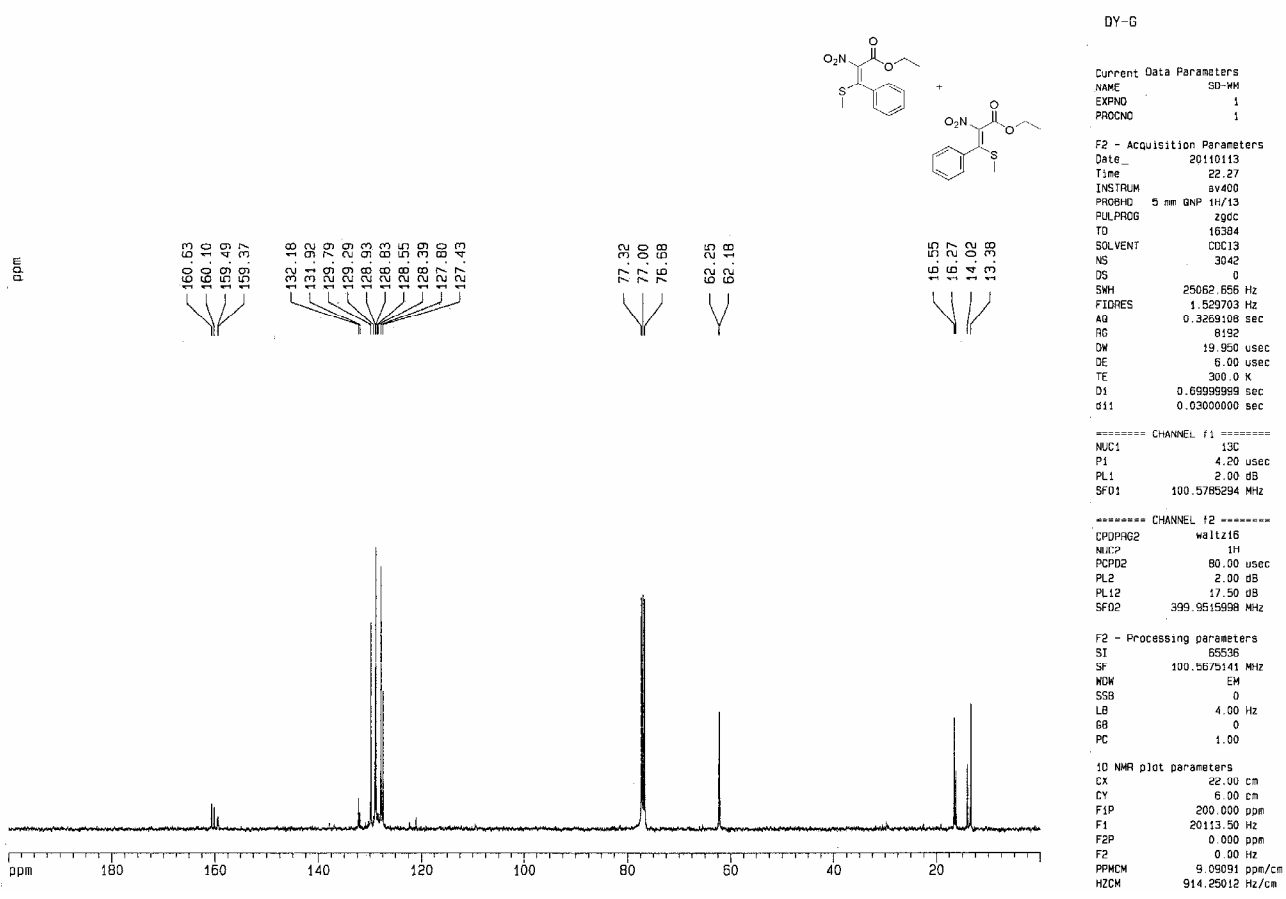

4a

STANDARD PROTON PARAMETERS

Archive directory: /export/home/ouyy/vnmrsys/data  
Sample directory:  
Pulse Sequence: s2pul  
Solvent: CDCl3  
Ambient temperature  
Files: r749  
INNOVA-500 "NMR500"

Relax. delay 1.000 sec  
Pulse 220.4 degrees  
Acq. time 1.892 sec  
Width 7856.6 Hz  
16 repetitions  
OBSERVE H1, 499.8025909 MHz  
DATA PROCESSING  
FT size 65536  
Total time 8 min, 46 sec

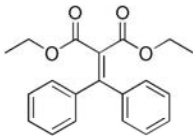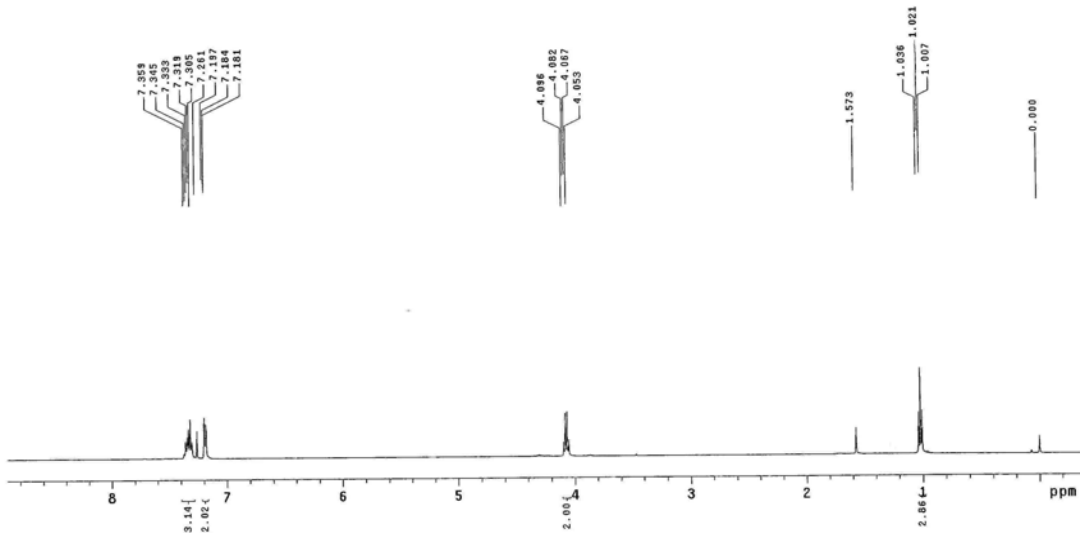

OY-A

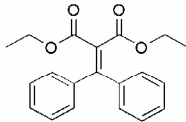

Current Data Parameters  
NAME SD-WM  
EXPNO 7  
PROCNO 1  
F2 - Acquisition Parameters  
Date\_ 20110117  
Time 15.40  
INSTRUM av400  
PROBHD 5 mm QNP 1H/13  
PULPROG zgpg30  
TD 16384  
SOLVENT CDCl3  
NS 4208  
DS 0  
SWH 25062.656 Hz  
FIDRES 1.529703 Hz  
AQ 0.3263108 sec  
RG 8192  
DW 19.950 usec  
DE 6.00 usec  
TE 303.0 K  
D1 0.63999999 sec  
d11 0.03000000 sec

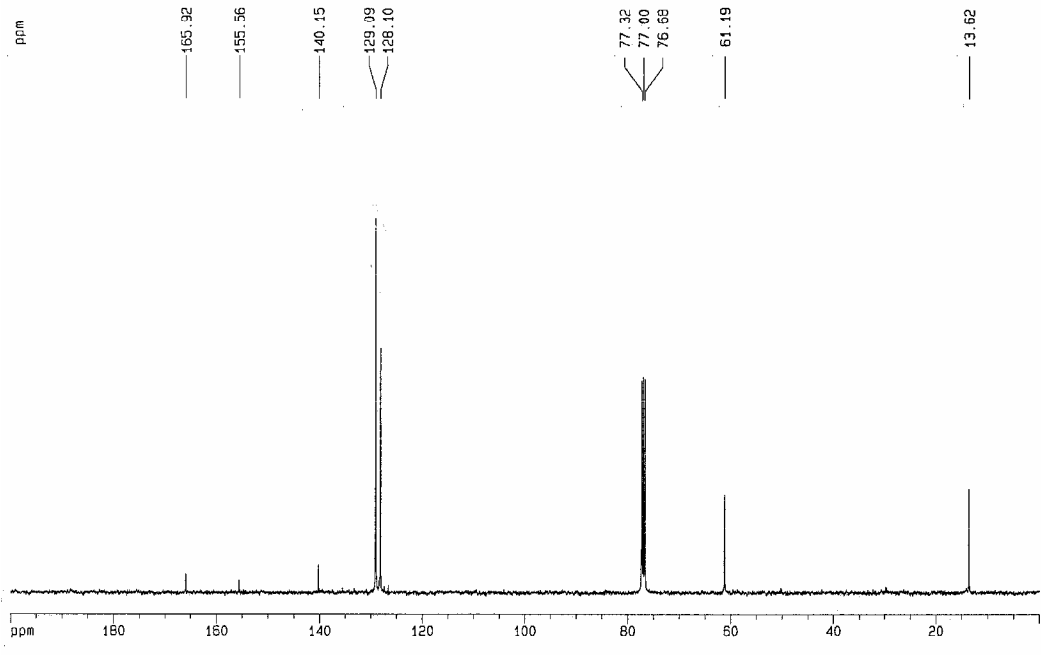

===== CHANNEL f1 =====  
NUC1 13C  
P1 2.70 usec  
PL1 -3.00 dB  
SF01 100.5785294 MHz

===== CHANNEL f2 =====  
CPDPRG2 waltz16  
NUC2 1H  
PCPD2 80.00 usec  
PL2 -3.00 dB  
PL12 18.20 dB  
SF02 399.9615998 MHz

F2 - Processing parameters  
SI 65536  
SF 100.5675060 MHz  
WDW EM  
SSB 0  
LB 4.00 Hz  
GB 0  
PC 2.00

1D NMR plot parameters  
CX 22.00 cm  
CY 6.00 cm  
F1P 200.000 ppm  
F1 20113.50 Hz  
F2P 0.000 ppm  
F2 0.00 Hz  
PPMCM 9.09091 ppm/cm  
HZCM 914.25006 Hz/cm

4b

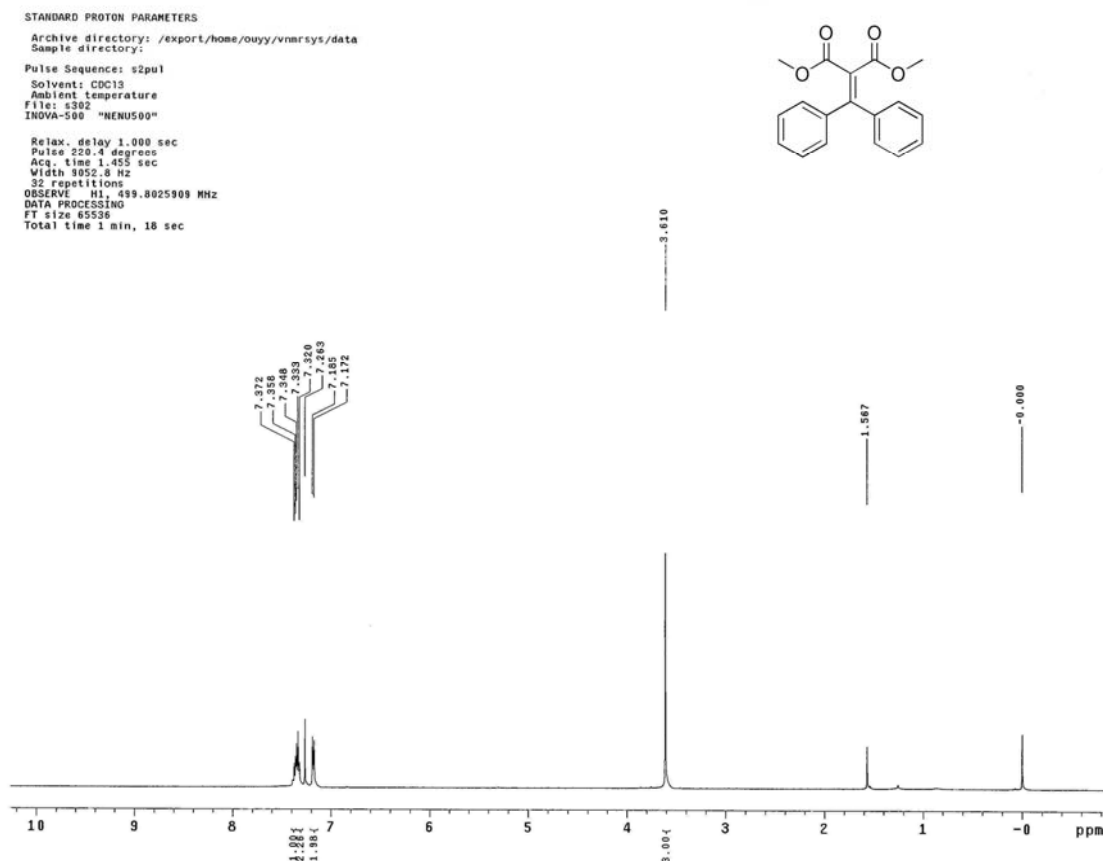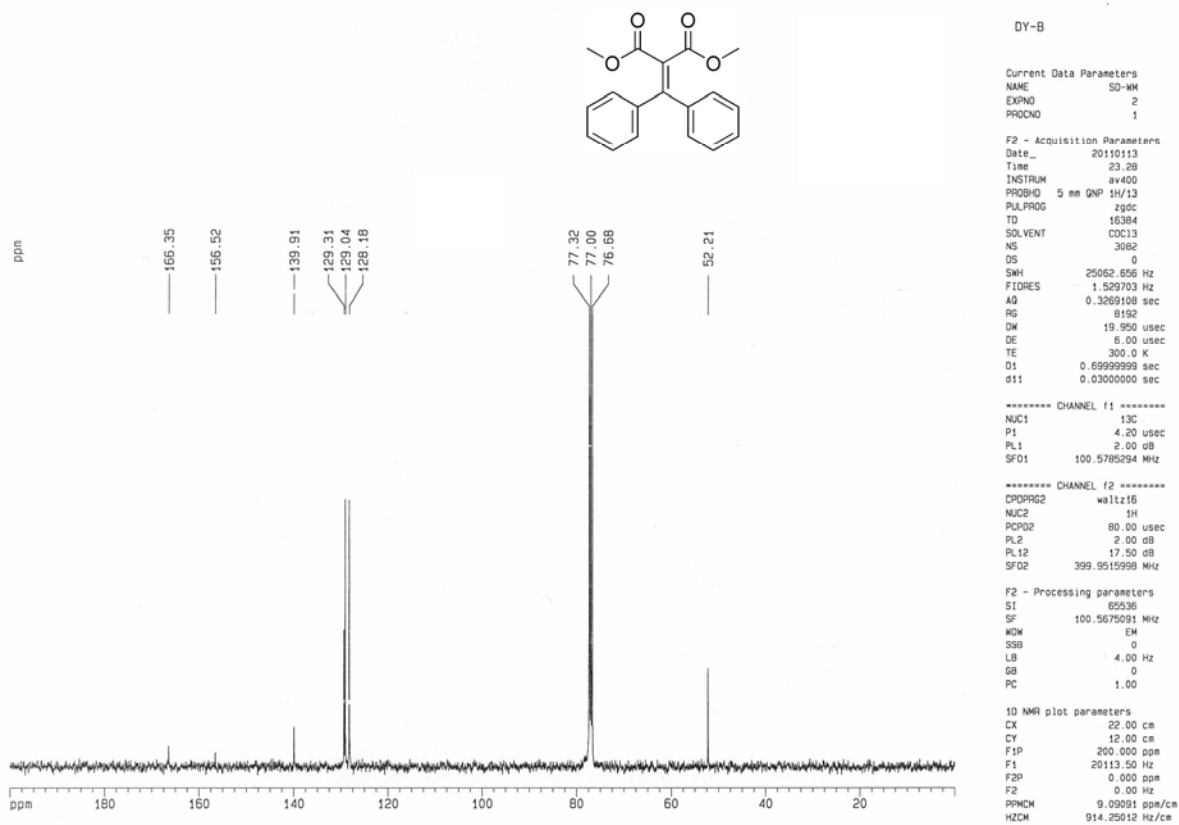

4c

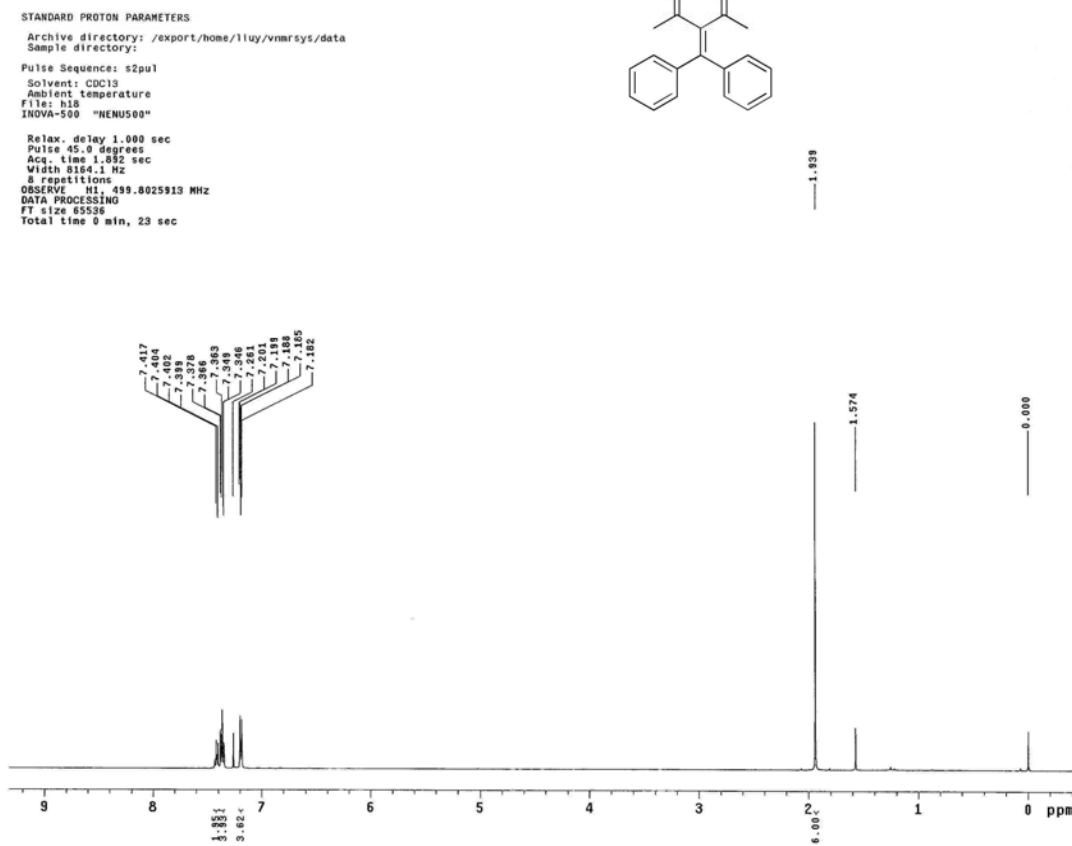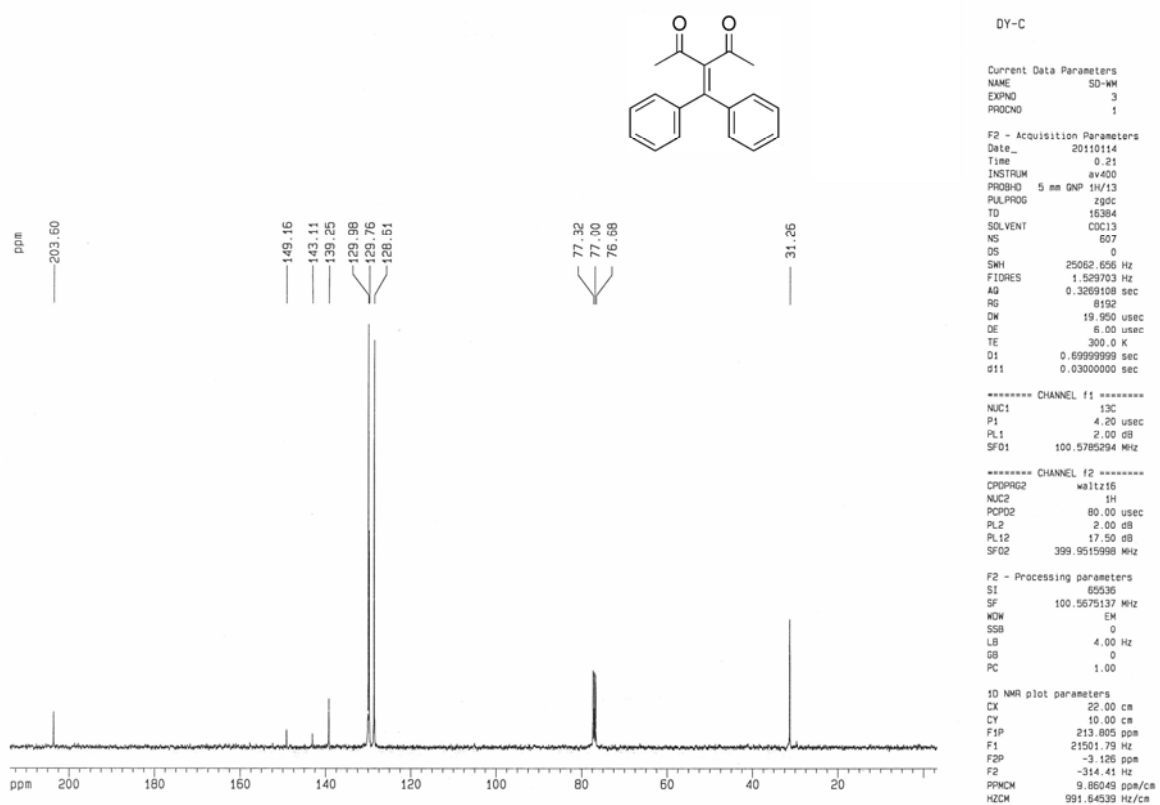

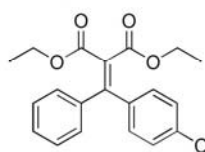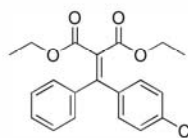

4e

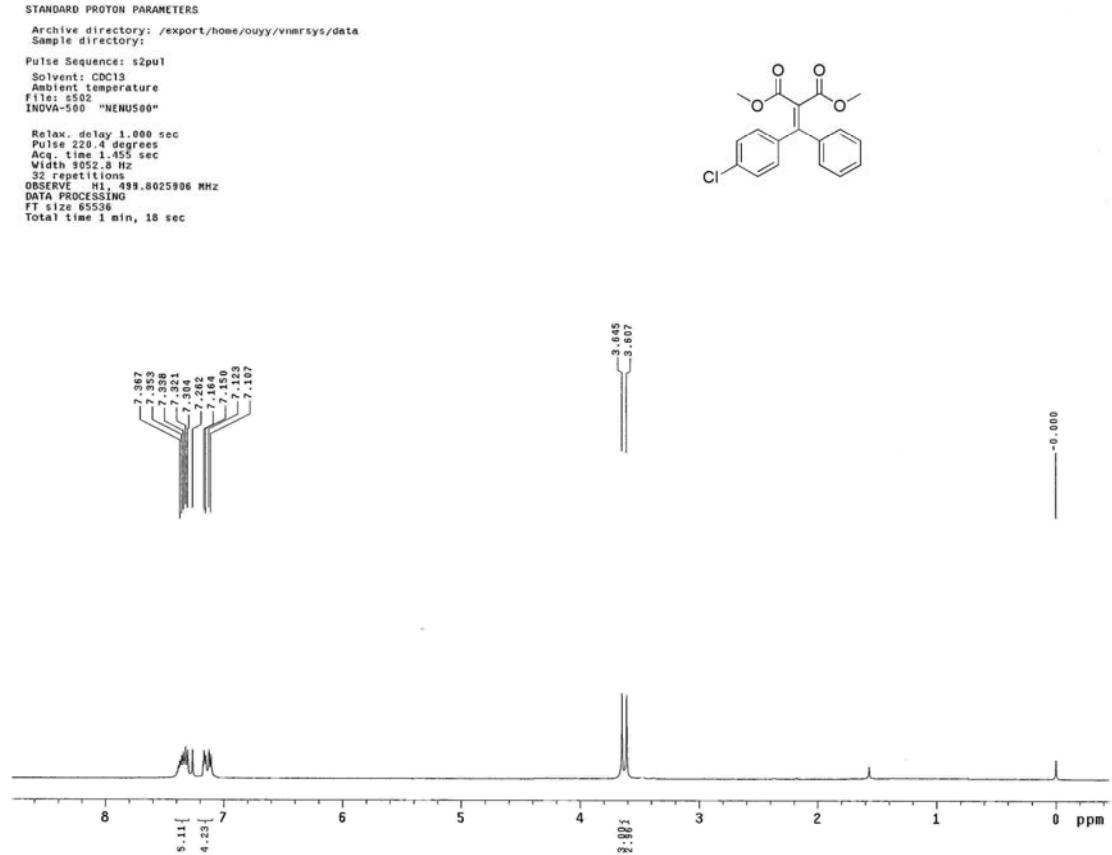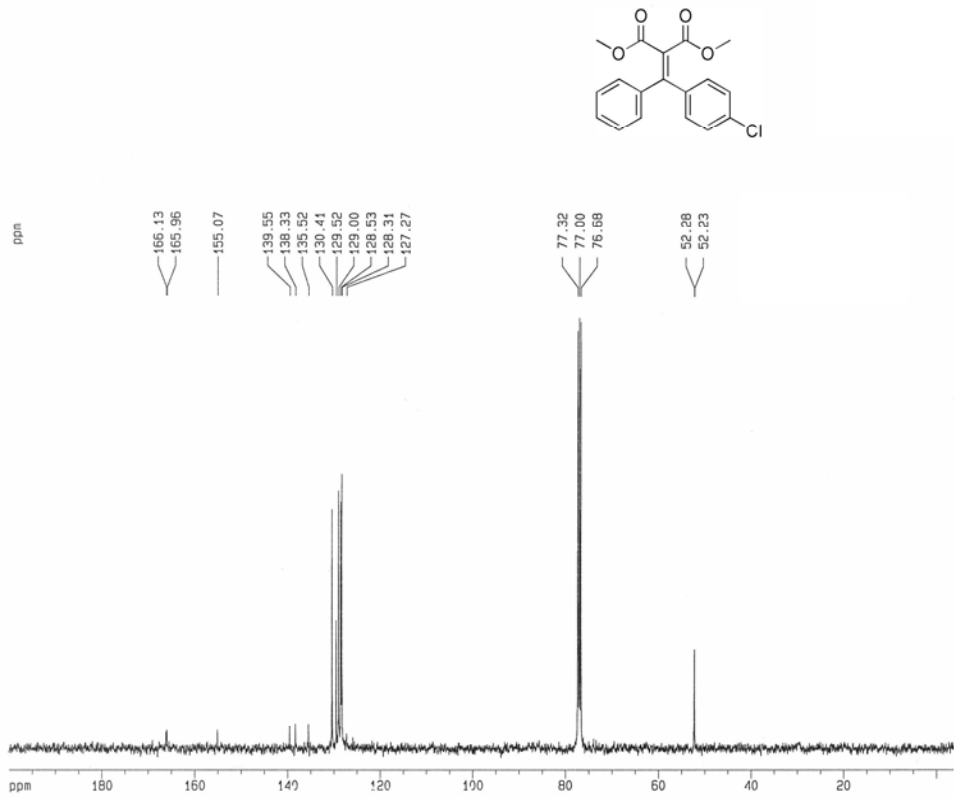

DY-F

Current Data Parameters

NAME SD-MM  
EXPNO 8  
PROCNO 1

F2 - Acquisition Parameters

Date\_ 20110117  
Time 19.42  
INSTRUM av400  
PROBHD 5 mm QNP  
PULPROG zgpg  
TD 16384  
SOLVENT CDCl3  
DS 4012  
SH 0  
FIDRES 25062.656 Hz  
AQ 1.529703 Hz  
RG 0.3269108 sec  
RG 8192  
DM 19.950 usec  
DE 6.00 usec  
TE 303.0 K  
d11 0.69999999 sec  
d11 0.03000000 sec

\*\*\*\*\* CHANNEL f1 \*\*\*\*\*

NUC1 13C  
P1 2.70 usec  
PL1 -3.00 dB  
SF01 100.5785294 MHz

\*\*\*\*\* CHANNEL f2 \*\*\*\*\*

CPDPRG2 waltz16  
NUC2 1H  
PCPD2 80.00 usec  
PL2 -3.00 dB  
PL12 18.20 dB  
SF02 399.9515998 MHz

F2 - Processing parameters

SI 65536  
SF 100.5675060 MHz  
WDW EM  
SSB 0  
LB 4.00 Hz  
GB 0  
PC 1.00

1D NMR plot parameters

CX 22.00 cm  
CY 10.00 cm  
F1P 200.000 ppm  
F1 20113.46 Hz  
F2P -3.696 ppm  
F2 -371.69 Hz  
RPMCM 9.25889 ppm/cm  
HZCM 931.14337 Hz/cm
